# Supplementary material for: Reducing the default dispense quantity for new opioid analgesic prescriptions: study protocol for a cluster randomised controlled trial
Source: PubMed Central journal article supplement — BMJ Open. 2018 Apr 20;8(4):e019559. doi: 10.1136/bmjopen-2017-019559 (PMC5914704; doi:10.1136/bmjopen-2017-019559), 2018-04-20
Supplement: bmjopen-2017-019559.draft_revisions.pdf [file bmjopen-2017-019559.draft_revisions.pdf]

# BMJ Open

BMJ Open is committed to open peer review. As part of this commitment we make the peer review history of every article we publish publicly available.

When an article is published we post the peer reviewers' comments and the authors' responses online. We also post the versions of the paper that were used during peer review. These are the versions that the peer review comments apply to.

The versions of the paper that follow are the versions that were submitted during the peer review process. They are not the versions of record or the final published versions. They should not be cited or distributed as the published version of this manuscript.

BMJ Open is an open access journal and the full, final, typeset and author-corrected version of record of the manuscript is available on our site with no access controls, subscription charges or pay-per-view fees (<http://bmjopen.bmj.com>).

If you have any questions on BMJ Open's open peer review process please email [info.bmjopen@bmj.com](mailto:info.bmjopen@bmj.com)

# BMJ Open

## Reducing the default dispense quantity for new opioid analgesic prescriptions: study protocol for a cluster randomized controlled trial

|                               |                                                                                                                                                                                                                                                                                                                                                                                                                                                                                                                                                                                                                                                                                                                                                                                                                   |
|-------------------------------|-------------------------------------------------------------------------------------------------------------------------------------------------------------------------------------------------------------------------------------------------------------------------------------------------------------------------------------------------------------------------------------------------------------------------------------------------------------------------------------------------------------------------------------------------------------------------------------------------------------------------------------------------------------------------------------------------------------------------------------------------------------------------------------------------------------------|
| Journal:                      | <i>BMJ Open</i>                                                                                                                                                                                                                                                                                                                                                                                                                                                                                                                                                                                                                                                                                                                                                                                                   |
| Manuscript ID                 | bmjopen-2017-019559                                                                                                                                                                                                                                                                                                                                                                                                                                                                                                                                                                                                                                                                                                                                                                                               |
| Article Type:                 | Protocol                                                                                                                                                                                                                                                                                                                                                                                                                                                                                                                                                                                                                                                                                                                                                                                                          |
| Date Submitted by the Author: | 11-Sep-2017                                                                                                                                                                                                                                                                                                                                                                                                                                                                                                                                                                                                                                                                                                                                                                                                       |
| Complete List of Authors:     | Bachhuber, Marcus; Montefiore Medical Center/Albert Einstein College of Medicine, Division of General Internal Medicine, Department of Medicine<br>Nash, Denis; City University of New York System,<br>Southern, William; Montefiore Medical Center/Albert Einstein College of Medicine, Division of Hospital Medicine<br>Heo, Moonseong; Montefiore Medical Center/Albert Einstein College of Medicine, Department of Epidemiology and Population Health<br>Berger, Matthew; Montefiore Medical Center/Albert Einstein College of Medicine, Division of Hospital Medicine; Montefiore Information Technology<br>Schepis, Mark; Montefiore Information Technology<br>Cunningham, CO; Montefiore Medical Center/Albert Einstein College of Medicine, Division of General Internal Medicine, Department of Medicine |
| Keywords:                     | PAIN MANAGEMENT, opioid analgesics, acute pain, electronic health record, default                                                                                                                                                                                                                                                                                                                                                                                                                                                                                                                                                                                                                                                                                                                                 |
|                               |                                                                                                                                                                                                                                                                                                                                                                                                                                                                                                                                                                                                                                                                                                                                                                                                                   |

SCHOLARONE™  
Manuscripts

Only

Title: Reducing the default dispense quantity for new opioid analgesic prescriptions: study protocol for a cluster randomized controlled trial

Authors:

1. Marcus A. Bachhuber, MD MSHP<sup>1</sup>
2. Denis Nash, PhD MPH<sup>2</sup>
3. William N. Southern, MD MS<sup>3</sup>
4. Moonseong Heo, PhD<sup>4</sup>
5. Matthew Berger, MD<sup>3,5</sup>
6. Mark Schepis, BS<sup>5</sup>
7. Chinazo O. Cunningham, MD MS<sup>1</sup>

Affiliations:

1. Division of General Internal Medicine, Montefiore Medical Center/Albert Einstein College of Medicine, Bronx, NY, USA
2. Institute for Implementation Science in Population Health, City University of New York (CUNY), NY, USA
3. Division of Hospital Medicine, Montefiore Medical Center/Albert Einstein College of Medicine, Bronx, NY, USA
4. Department of Epidemiology and Population Health, Montefiore Medical Center/Albert Einstein College of Medicine, Bronx, NY, USA
5. Montefiore Information Technology, Montefiore Medical Center, Bronx, NY, USA

Corresponding Author: Marcus A. Bachhuber (marcus.bachhuber@gmail.com)

1  
2  
3 Abstract (word limit = 300)  
4

5 Introduction  
6

7 As opioid analgesic consumption has grown, so have opioid use disorder and opioid-related overdoses.  
8  
9 Reducing the quantity of opioid analgesics prescribed for acute non-cancer pain can potentially reduce  
10  
11 risks to the individual receiving the prescription and to others who might unintentionally or intentionally  
12  
13 consume any leftover tablets. Reducing the default dispense quantity for new opioid analgesic  
14  
15 prescriptions in the electronic health record (EHR) is a promising intervention to reduce prescribing.  
16  
17

18 Methods and analysis  
19

20 This study is a prospective cluster randomized controlled trial with two parallel arms. Primary care sites  
21  
22 (n=32) and emergency departments (n=4) will be randomized in matched pairs to either a modification of  
23  
24 the EHR so that new opioid analgesic prescriptions default to a dispense quantity of 10 tablets  
25  
26 (intervention) or to no EHR change (control). The dispense quantity will remain fully modifiable by  
27  
28 providers in both arms. From 6 months pre-intervention to 18 months post-intervention, patient-level data  
29  
30 will be analyzed (i.e., the patient is the unit of inference). Patient eligibility criteria are: a) received a new  
31  
32 opioid analgesic prescription, defined as no other opioid analgesic prescription in the prior 6 months; b)  
33  
34 age  $\geq$  18 years; and c) no cancer diagnosis within 1 year prior to the new opioid analgesic prescription.  
35  
36 The primary outcome will be the quantity of opioid analgesics prescribed in the initial prescription.  
37  
38 Secondary outcomes will include opioid analgesic re-orders and health service utilization within 30 days  
39  
40 after the initial prescription. Outcomes will be compared between study arms using a difference-in-  
41  
42 differences analysis.  
43  
44

45 Ethics and dissemination  
46

47 This study has been approved by the Montefiore Medical Center/Albert Einstein College of Medicine  
48  
49 Institutional Review Board with a waiver of informed consent (2016-6036) and is registered on  
50  
51 ClinicalTrials.gov (NCT03003832, 6 December 2016). Findings will be disseminated through  
52  
53 publication, conferences, and meetings with health system leaders.  
54  
55  
56  
57  
58  
59  
60

1  
2  
3 Strengths and limitations of this study: (1-5 points)  
4

- 5 1. Reducing the default dispense quantity for new opioid analgesic prescriptions in the electronic  
6 health record is a novel intervention with the potential for widespread implementation and scale-  
7 up  
8  
9  
10  
11 2. A cluster randomized controlled trial will provide rigorous evidence for or against efficacy  
12  
13 3. Consideration of unintended consequences such as prescription re-orders and increased health  
14 service utilization will provide additional information on the impact of the intervention  
15  
16 4. The setting of the trial (a single urban medical center, with multiple, diverse clinics) may limit  
17 generalizability  
18  
19  
20 5. Lack of access to data (i.e., prescriptions and visits) at outside institutions may lead to  
21 measurement error for some outcomes  
22  
23  
24  
25  
26  
27  
28  
29  
30  
31  
32  
33  
34  
35  
36  
37  
38  
39  
40  
41  
42  
43  
44  
45  
46  
47  
48  
49  
50  
51  
52  
53  
54  
55  
56  
57  
58  
59  
60

## Introduction

In the United States, opioid consumption, opioid use disorder, and fatal overdoses involving opioids have increased dramatically. Between 1999 and 2015, sales of opioid analgesics tripled.<sup>1</sup> In 2015, 33,091 individuals died of a drug overdose involving opioids.<sup>2</sup> Beyond the human cost, the economic cost of opioid use disorder and overdose is estimated to be almost \$80 billion (2015 USD) annually.<sup>3</sup>

While most research aiming to reduce morbidity and mortality from opioid analgesics focuses on people with chronic pain, opioid analgesics for acute non-cancer pain are also associated with significant personal and public health risk. Fatal and non-fatal overdoses occur among people with new or short-term opioid analgesic prescriptions.<sup>4,5</sup> Furthermore, up to 72% of people prescribed opioid analgesics have tablets left over, and most plan to keep them.<sup>6-8</sup> Leftover tablets are often misused, diverted, or accidentally ingested by household members (e.g., children) and are a contributor to overdose mortality beyond the index patient/prescription.<sup>9-13</sup> Previous interventions to reduce opioid analgesic prescribing for acute pain have included provider education or promulgation of guidelines; however, these interventions can be labor-intensive and may only have short-lived effects.

Environmental or structural interventions, such as modifying default prescribing options, have the potential to change provider behavior. Defaults can have powerful effects, including in health care settings.<sup>14</sup> For opioid analgesic prescriptions, this would take the form of reducing the default dispense quantity (i.e., the default number of tablets to dispense) for all new prescriptions. While providers can modify the number of tablets actually prescribed, default options can alter practice. For example, within the electronic health record (EHR), changing prescription defaults from brand name to generic increased generic prescribing significantly.<sup>15</sup> In one recent study involving opioid analgesics, *removing* the existing default dispense quantity for two types of opioid analgesics was associated with a modestly higher mean number of tablets dispensed and an increase in the variability of prescriptions, relative to pre-intervention.<sup>16</sup> While these studies suggest that defaults can alter opioid analgesic prescribing behavior,

1  
2  
3 the impact of reducing the default dispense quantity to encourage reductions in opioid analgesic  
4 prescribing has not been rigorously studied.  
5  
6  
7  
8

9 While reducing the default dispense quantity for new opioid analgesic prescriptions has the potential to  
10 reduce the quantity prescribed for acute pain, any reduction may be offset, at least in part, by the potential  
11 for unintended consequences. These can include an increased need for prescription re-orders, medical  
12 visits due to inadequately treated pain, or both. However, the large proportion of patients with leftover  
13 opioid analgesic tablets suggests that reductions in the quantity prescribed will simply move toward  
14 aligning prescriptions with what patients actually take for the acute episode of pain.<sup>6-8</sup>  
15  
16  
17  
18  
19  
20  
21  
22  
23

24 The goal of this study is to investigate the impact of a uniform, reduced, default dispense quantity for new  
25 opioid analgesic prescriptions on the quantity prescribed for acute pain. We will test this intervention in a  
26 cluster randomized controlled trial in 32 primary care sites and 4 EDs, responsible for over 19,000 new  
27 opioid analgesic prescriptions annually. We hypothesize that, compared to control, reducing the default  
28 dispense quantity will lead to a higher percentage of prescriptions written for the new, reduced default  
29 number of tablets or fewer. In addition, compared to control, we hypothesize that reducing the default  
30 dispense quantity will not lead to a significant increase in opioid analgesic prescription re-orders or  
31 primary care visits, ED visits, or hospitalizations.  
32  
33  
34  
35  
36  
37  
38  
39  
40  
41  
42

### 43 **Methods: Participants, interventions, and outcomes**

44  
45  
46

#### 47 Study Setting

48  
49 Montefiore Medical Center (Montefiore) is the largest health care system in The Bronx (a borough of  
50 New York City) and provides comprehensive primary, specialty, surgical, and emergency care at 4  
51 hospitals, 4 EDs, and over 40 ambulatory clinics, with over 3 million patient visits annually. Montefiore  
52 is also a major integrated health care delivery system, administering federal (i.e., managed Medicaid and  
53  
54  
55  
56  
57  
58  
59

1  
2  
3 Medicare) and private insurance plans and coordinating care for approximately 225,000 individuals. For  
4 this study, we have selected the ambulatory settings in which opioid analgesic prescribing is common:  
5  
6 primary care practices and EDs.  
7  
8  
9

## 10 Eligibility criteria

11  
12  
13 *Primary care and ED sites.* We will include all primary care and ED sites within Montefiore. Primary  
14 care sites can be designated as internal medicine, family medicine, or urgent care.  
15

16  
17 *Provider participants.* As the intervention is a modification to the EHR, the primary participants are  
18 Montefiore providers. Eligible providers will include those who provide adult primary care or ED care.  
19

20  
21 *Patient participants.* We will analyze outcomes for patients that: a) received a *new* opioid analgesic  
22 prescription, defined as no other opioid analgesic prescription in the preceding 6 months (a definition  
23 used in previous cohort studies);<sup>17,18</sup> b) age  $\geq$  18 years; and c) no cancer diagnosis within 1 year prior to  
24 the new opioid analgesic prescription.  
25  
26  
27  
28  
29  
30

## 31 Intervention and control conditions

32  
33 The intervention condition is a site-level change to the EHR to implement a uniform, reduced, default  
34 dispense quantity for new opioid analgesic prescriptions. The number of tablets actually prescribed will  
35 be *fully modifiable* by providers who can tailor the prescription based on clinical factors. The intervention  
36 will include all short-acting opioid analgesics commonly used to treat acute pain: immediate-release  
37 oxycodone, immediate-release hydrocodone, tramadol, and codeine. We will include all brand and  
38 generic formulations and all tablet strengths and co-formulations with acetaminophen.  
39  
40  
41  
42  
43  
44  
45  
46  
47  
48

49 We have chosen 10 tablets as the default dispense quantity for all medication products included in the  
50 intervention condition. For opioid analgesics, there are no specific studies addressing the optimal quantity  
51 that minimizes the risks of harms while adequately treating pain. Generally, guidelines recommend a  
52 limited duration with early re-assessment.<sup>19-21</sup> While medications included in the intervention are typically  
53  
54  
55  
56  
57  
58  
59



1  
2  
3 written for a range of between 1 to 2 tablets every 4 to 6 hours, as needed, patients may only take between  
4  
5 1 and 3 tablets per day total.<sup>22-24</sup> We chose a default of 10 tablets because we believe it represents at least  
6  
7 a 3- to 5-day supply for most patients.  
8  
9

10  
11 The usual EHR will serve as the control condition. Depending on the exact medication product, the pre-  
12  
13 existing default number of tablets is typically 30 or blank, with several outliers (Table). These pre-  
14  
15 existing defaults are a mixture of those pre-loaded in the base installation of our EHR and those created  
16  
17 by our institution when generating defaults for commonly-prescribed medications. While most products  
18  
19 have a pre-existing default, some do not (i.e., the “quantity dispensed” field is blank). Therefore, while  
20  
21 the intervention will reduce the default dispense quantity for most products, it will create a default  
22  
23 dispense quantity for some.  
24  
25

## 26 27 28 Outcomes

29  
30 To determine the impact of the intervention, we will analyze patient-level outcomes. Therefore, the unit  
31  
32 of inference is the patient. We will collect outcome data from 6 months prior to intervention  
33  
34 implementation to 18 months after implementation.  
35  
36

37  
38  
39 *Primary outcome: Quantity of opioid analgesics.* This outcome refers to the quantity prescribed in each  
40  
41 new opioid analgesic prescription. We will use three measures of the primary outcome:  
42

- 43 1. *≤ 10 tablets (primary measure, dichotomous).* We will classify all prescriptions as greater than or  
44  
45 less than/equal to 10 tablets (the default). This outcome is relevant specifically to the impact of  
46  
47 the intervention.  
48
- 49 2. *Number of tablets to dispense (continuous).* This outcome is relevant to accidental ingestion and  
50  
51 diversion (i.e., the number of tablets available for consumption).  
52
- 53 3. *Total morphine milligram equivalents (MME) to dispense (continuous).* The use of MME  
54  
55 standardizes comparisons between different types of opioid analgesics with different strengths  
56  
57  
58  
59

1  
2  
3 and potencies.<sup>25</sup> Overdose risk increases with increasing MME<sup>4,26,27</sup> so this measure is relevant to  
4  
5 overdose risk.  
6  
7

8  
9  
10 Secondary outcomes:

- 11  
12 1. *Opioid analgesic prescription re-orders within 30 days of the initial prescription.* Such re-orders  
13  
14 can occur if patients do not receive an adequate supply of opioid analgesics to treat their pain in  
15  
16 the initial prescription and contact their providers to obtain more. Measured as: a) any re-order  
17  
18 (y/n); b) number of tablets; and c) MME.  
19  
20 2. *Health service utilization within 30 days of the initial prescription.* Medical visits can occur if  
21  
22 patients experience an opioid-related adverse event (e.g., delirium) or intractable pain (e.g., from  
23  
24 not enough medication). We will analyze the number of primary care visits, ED visits, and  
25  
26 hospitalizations.  
27  
28  
29

30  
31 Provider and patient characteristics (covariates)

32  
33 In addition to primary and secondary outcomes, we will collect additional data on providers and patients.  
34  
35 We have selected variables that are likely to be confounders. For providers, we will collect sex and years  
36  
37 since graduation from medical school. For patients, we will collect demographic information (age, sex,  
38  
39 and race/ethnicity as recorded in the EHR). We will also collect the pain diagnosis at the visit where the  
40  
41 initial opioid analgesic was prescribed (i.e., the indication for the opioid analgesic)<sup>17</sup> in addition to the  
42  
43 presence or absence of a history of psychiatric illness and a history of substance use disorder within the 1  
44  
45 year preceding the initial opioid analgesic prescription.  
46  
47  
48

## 49 **Methods: assignment of interventions**

50  
51  
52  
53  
54 Randomization

55  
56 The unit of randomization will be the site (i.e., cluster randomization). We chose site-level randomization  
57  
58  
59

1  
2  
3 instead of provider-level randomization to reduce contamination and to potentially increase the  
4 intervention's effectiveness via peer effects.<sup>28,29</sup> At Montefiore, virtually all providers only practice at one  
5 site. In addition, technical limitations of Montefiore's EHR (Epic) render provider-level randomization  
6 less feasible.  
7  
8  
9  
10

11  
12  
13 Study sites differ greatly in visit volume and characteristics; therefore, we will randomize in matched  
14 pairs to avoid a major imbalance which could threaten study validity. For primary care sites, within strata  
15 of specialty (i.e., internal medicine and family medicine) and whether the site is a training site for resident  
16 physicians (yes/no), we will use optimal non-bipartite matching to pair sites based on the number of new  
17 opioid analgesic prescriptions, the number of visits, and the percentage of patients with commercial  
18 insurance.<sup>30</sup> For ED sites, given the very large differences in visit volume, we will divide the 4 sites into a  
19 "pair" consisting of the largest ED versus the 3 other smaller EDs combined.  
20  
21  
22  
23  
24  
25  
26  
27  
28  
29

### 30 Blinding

31  
32 Randomization of sites within pairs will be conducted by the study statistician and provided directly to  
33 the health information technology department. Other study investigators will therefore be blind to  
34 randomization assignment.  
35  
36  
37  
38  
39  
40

### 41 **Methods: data collection, management and analysis**

#### 42 Data collection and management

43  
44  
45 We will obtain provider data from our institution's internal provider directory as well as publicly-  
46 accessible medical license data from New York State. We will obtain all patient data from Montefiore's  
47 EHR. Study data will be stored in an encrypted, password-protected database only accessible to study  
48 investigators.  
49  
50  
51  
52  
53  
54  
55  
56  
57  
58  
59  
60

### Statistical analysis

We will conduct analyses at two time points, 6 months after intervention implementation and 18 months after intervention implementation. Using a difference-in-differences (DID) analysis, we will determine the impact of the intervention by comparing the change in outcomes in the intervention group to the change in outcomes in the control group.<sup>31,32</sup> For example, for the 6-month analysis, we will compare the change in the intervention group's outcomes from -6 months to +6 months to the change in the control group's outcomes from -6 months to +6 months.

A DID analysis has advantages. First, while we can include covariates to adjust for imbalance in site, provider, and patient characteristics between intervention and control groups, DID accounts for residual time-invariant group-level heterogeneity such as differences in baseline outcome levels and hard-to-measure factors like overall quality of care between intervention and control sites.<sup>32</sup> Second, DID will allow us to account for prescribing changes due to factors other than the intervention (e.g., state or city policies aimed at reducing prescribing).

We will conduct the DID analysis using generalized linear mixed regression models. We will include a variable indicating time (pre-intervention/post-intervention) and a variable indicating study allocation (intervention/control). In DID, the interaction of these two variables is the parameter of interest. We will include relevant site characteristics (number of new opioid analgesic prescriptions, the number of visits, and percentage of patients with commercial insurance), provider characteristics (sex and years since medical school graduation) and patient characteristics (age, sex, race/ethnicity, pain diagnosis, history of substance use disorder, history of psychiatric disorder) as covariates in all models. To account for the nesting of patients within providers and providers within sites, we will include random intercepts both at the provider level and at the matched site pair level. In addition to this specification, we will explore methods to allow for heterogeneity of the intervention's effect between matched pairs.

1  
2  
3 For each outcome, we will explore the distribution of the outcome variable and potential transformations  
4 to determine the appropriate regression models (e.g., binomial, linear, Poisson, or negative binomial).

5  
6  
7 When analyzing the impact of the intervention at 18 months, we will identify any change in the  
8 intervention's impact after 6 months by using the 0 to 6 month post-intervention period as the referent.  
9

10  
11  
12  
13 In addition to the main analysis, we will conduct several exploratory sub-group analyses. We will analyze  
14 the impact of the intervention stratified by site type (i.e., primary care versus ED) and by medication type  
15 (e.g. Schedule II versus Schedule III and IV). We will also perform separate analyses on products where  
16 the pre-existing default was reduced and products where there was no pre-existing default (i.e., the pre-  
17 existing "quantity dispensed" field was blank).  
18  
19  
20  
21  
22  
23  
24  
25

#### 26 Sample size

27  
28 From preliminary data analyses, we estimate eligible providers (N=~17 per site) will write a total of 9,580  
29 new opioid analgesic prescriptions (N=~15 prescriptions per provider) from the 36 sites during a six  
30 month post-intervention period. And, in the baseline period (i.e., 6 months prior), 32.7% of prescriptions  
31 will be for  $\leq 10$  tablets. From these parameters, we estimated the minimal detectable difference between  
32 study arms using a 3-level hierarchical model (i.e., patients clustered within providers who are clustered  
33 within matched site pairs). Because the intraclass correlation coefficient (ICC) is not known, we used a  
34 range of ICC from 0.01 to 0.1 at the patient level; only this level of ICC is needed for power analysis  
35 under our study design.<sup>33</sup> Within this range of ICC,  $\alpha=0.05$ , power  $\geq 80\%$ , and assuming a 3%  
36 increase in prescriptions for  $\leq 10$  tablets in the control arm, this study will be powered to detect a change  
37 in the intervention arm of 6.8-7.1%. This is an increase in prescriptions  $\leq 10$  tablets from 32.7% pre-  
38 intervention to 39.5-39.8% post-intervention.  
39  
40  
41  
42  
43  
44  
45  
46  
47  
48  
49  
50  
51  
52  
53

#### 54 **Methods: monitoring**

55  
56  
57  
58  
59  
60

1  
2  
3 The principal investigator (MAB) will oversee data and safety monitoring, including review of any  
4 protocol deviations (e.g., unplanned changes to the EHR) and submission of an annual progress report to  
5 the Montefiore Medical Center/Albert Einstein College of Medicine Institutional Review Board and the  
6 study funder (The National Institute on Drug Abuse of the National Institutes of Health). As this study  
7 evaluates an EHR modification using data collected directly from the EHR, study investigators will not  
8 have direct contact with any human subjects. Because of the low-risk nature of the intervention, we will  
9 not convene a formal Data Safety and Monitoring Board and will not conduct planned audits.  
10  
11  
12  
13  
14  
15  
16  
17  
18  
19

### 20 **Ethics and dissemination**

21  
22  
23  
24 This trial was approved by the Montefiore Medical Center/Albert Einstein College of Medicine  
25 Institutional Review Board (IRB number: 2016-6036). This trial was also granted a waiver of informed  
26 consent, similar to previous studies of EHR-based provider interventions.<sup>34,35</sup> During data collection and  
27 analysis, all data collected for this study will be de-identified at the earliest possible opportunity and  
28 stored in an encrypted and password-protected database. At the conclusion of the trial, we will investigate  
29 the feasibility of depositing de-identified data in a publically-accessible repository that maintains  
30 confidentiality.  
31  
32  
33  
34  
35  
36  
37  
38  
39  
40

41 We will disseminate the results of this study through peer-reviewed publications, presentations at  
42 scientific conferences, and meetings with key stakeholders including health system leadership. Reporting  
43 of results will be in accordance with the Consolidated Standards of Reporting Trials (CONSORT)  
44 extension to cluster randomized trials.<sup>36</sup>  
45  
46  
47  
48  
49  
50

### 51 **Limitations**

52  
53  
54  
55  
56 This study has limitations. First, we will only able to obtain data from within our medical center, outside  
57  
58  
59  
60

1  
2  
3 prescriptions and visits will not be captured. Therefore, we may underestimate the number of opioid  
4 analgesic re-orders and the degree of health service utilization. Further, this may bias the study findings if  
5 patients in one arm are more likely to obtain follow-up care at Montefiore than patients in the other arm.  
6  
7 Second, as our main data source is the EHR, we do not have information on whether prescriptions were  
8 actually dispensed and our outcome measures are limited to those recorded in the course of routine  
9 clinical care. To address this limitation, we are planning to conduct a telephone survey of patients to  
10 determine the impact of the intervention on patient-reported outcomes such as pain, functioning, and  
11 patient satisfaction.  
12  
13  
14  
15  
16  
17  
18  
19  
20  
21

## 22 **Conclusion**

23  
24  
25  
26 Interventions to reduce the quantity of opioid analgesics prescribed for acute non-cancer pain are needed.  
27  
28 Given widespread adoption of EHRs, reducing the default dispense quantity in the EHR to reduce opioid  
29 analgesic prescribing represents a scalable intervention with potential for broad impact. With almost 300  
30 million opioid analgesic prescriptions written annually in the US, if reducing the default dispense quantity  
31 leads to a mean reduction of even 1 or 2 tablets per prescription, this intervention could potentially reduce  
32 the number of tablets dispensed annually by hundreds of millions. Decreases in supply may translate to  
33 downstream reductions in morbidity and mortality related to opioid analgesics.  
34  
35  
36  
37  
38  
39  
40  
41  
42

43 While reducing the quantity of opioid analgesics prescribed for acute pain is appealing, any intervention  
44 must also take into account the potential for unintended consequences such as inadequately treated pain.  
45 To that end, we designed the current study to explicitly detect increases in opioid analgesic prescription  
46 re-orders and health service utilization. Further, our planned patient survey will help determine the  
47 intervention's impact on patient-reported outcomes.  
48  
49  
50  
51  
52

53  
54  
55  
56 In summary, reducing the default dispense quantity for new opioid analgesic prescriptions is a promising  
57  
58  
59  
60

1  
2  
3 intervention to reduce opioid analgesic prescribing for acute pain. We will test this intervention in a  
4 cluster randomized controlled trial, a design that will provide rigorous evidence. The results of this trial  
5 will contribute valuable information to future efforts to reduce morbidity and mortality from opioid  
6 analgesics.  
7  
8  
9  
10  
11  
12  
13  
14  
15  
16  
17  
18  
19  
20  
21  
22  
23  
24  
25  
26  
27  
28  
29  
30  
31  
32  
33  
34  
35  
36  
37  
38  
39  
40  
41  
42  
43  
44  
45  
46  
47  
48  
49  
50  
51  
52  
53  
54  
55  
56  
57  
58  
59  
60

For peer review only



1  
2  
3 Authors' contributions: MAB is principal investigator of this trial and led its conception and design. DN,  
4  
5 MH, WS, and CC supervised the study design and all authors made substantial contributions to the  
6  
7 conception and design of this work. MAB drafted the manuscript and all authors revised it for critically  
8  
9 important intellectual content. All authors provided final approval of the manuscript.  
10

11  
12  
13 Funding: This study is supported by the National Institute on Drug Abuse (K08DA043050) and the  
14  
15 National Center for Advancing Translational Sciences (CTSA Grant UL1TR001073) of the National  
16  
17 Institutes of Health. CC is also supported by the National Institute on Drug Abuse (K24DA036955). CC  
18  
19 and DN are supported by National Institute of Allergy and Infectious Diseases of the National Institutes  
20  
21 of Health (P30AI124414). The content is solely the responsibility of the authors and does not necessarily  
22  
23 represent the official views of the National Institutes of Health. The funding agency has no role in design  
24  
25 or conduct of the study or the decision to publish study results.  
26  
27  
28  
29

30 Competing interests: The authors declare that they have no competing interests  
31  
32  
33  
34  
35  
36  
37  
38  
39  
40  
41  
42  
43  
44  
45  
46  
47  
48  
49  
50  
51  
52  
53  
54  
55  
56  
57  
58  
59  
60

Table. Pre-existing default dispense quantity for short-acting opioid analgesics included in the intervention\*

| Opioid ingredient             | Product name and strength                      | Primary care sites | Emergency department sites |
|-------------------------------|------------------------------------------------|--------------------|----------------------------|
| Oxycodone                     | oxycodone 5 mg tablet                          | 30                 | 30                         |
|                               | oxycodone 5 mg capsule                         | 30                 | 30                         |
|                               | oxycodone 10 mg tablet                         | Blank              | Blank                      |
|                               | oxycodone 15 mg tablet                         | 30                 | 30                         |
|                               | oxycodone 20 mg tablet                         | Blank              | Blank                      |
|                               | oxycodone 30 mg tablet                         | 30                 | 30                         |
|                               | Roxicodone® 5mg tablet                         | 20                 | 20                         |
|                               | Roxicodone® 15 mg tablet                       | 30                 | 30                         |
|                               | Roxicodone® 30 mg tablet                       | 30                 | 30                         |
|                               | oxycodone-acetaminophen 2.5 mg-325 mg tablet   | 30                 | 30                         |
|                               | oxycodone-acetaminophen 5 mg-325 mg tablet     | Blank              | Blank                      |
|                               | oxycodone-acetaminophen 7.5 mg-325 mg tablet   | 30                 | 30                         |
|                               | oxycodone-acetaminophen 10 mg-325 mg tablet    | 30                 | 30                         |
|                               | Percocet® 2.5 mg-325 mg tablet                 | 30                 | 30                         |
|                               | Percocet® 5 mg-325 mg tablet                   | Blank              | Blank                      |
|                               | Percocet® 7.5 mg-325 mg tablet                 | 20                 | 20                         |
| Percocet® 10 mg-325 mg tablet | 20                                             | 20                 |                            |
| Endocet® 2.5 mg-325 mg tablet | 30                                             | 30                 |                            |
| Endocet® 5 mg-325 mg tablet   | Blank                                          | Blank              |                            |
| Endocet® 7.5 mg-325 mg tablet | 30                                             | 30                 |                            |
| Endocet® 10 mg-325 mg tablet  | 30                                             | 30                 |                            |
| Hydrocodone                   | hydrocodone-acetaminophen 5 mg-300 mg tablet   | 112                | 112                        |
|                               | hydrocodone-acetaminophen 5 mg-325 mg tablet   | 50                 | 30                         |
|                               | hydrocodone-acetaminophen 7.5 mg-300 mg tablet | 180                | 180                        |
|                               | hydrocodone-acetaminophen 7.5 mg-325 mg tablet | 50                 | 30                         |
|                               | hydrocodone-acetaminophen 10 mg-300 mg tablet  | 180                | 180                        |
|                               | hydrocodone-acetaminophen 10 mg-325 mg tablet  | 30                 | 30                         |
|                               | Lortab® 5 mg-325 mg tablet                     | 30                 | 30                         |
|                               | Lortab® 7.5 mg-325 mg tablet                   | 30                 | 30                         |
|                               | Lortab® 10 mg-325 mg tablet                    | 30                 | 30                         |
|                               | Norco® 5 mg-325 mg tablet                      | 30                 | 30                         |
| Norco® 7.5 mg-325 mg tablet   | 30                                             | 30                 |                            |
| Norco® 10 mg-325 mg tablet    | 30                                             | 30                 |                            |
| Tramadol                      | Tramadol 50 mg tablet                          | Blank              | Blank                      |
|                               | Ultram® 50 mg tablet                           | 90                 | 20                         |
|                               | Tramadol-acetaminophen 37.5 mg-325 mg tablet   | 30                 | 30                         |
|                               | Ultracet® 37.5 mg -325 mg tablet               | 30                 | 30                         |
| Codeine                       | codeine sulfate 15 mg tablet                   | 30                 | 30                         |
|                               | codeine sulfate 30 mg tablet                   | 30                 | 30                         |
|                               | acetaminophen-codeine 300-15mg tablet          | 30                 | 30                         |

1  
2  
3  
4  
5  
6  
7  
8  
9  
10  
11  
12  
13  
14  
15  
16  
17  
18  
19  
20  
21  
22  
23  
24  
25  
26  
27  
28  
29  
30  
31  
32  
33  
34  
35  
36  
37  
38  
39  
40  
41  
42  
43  
44  
45  
46  
47  
48  
49  
50  
51  
52  
53  
54  
55  
56  
57  
58  
59  
60

|                                       |       |       |
|---------------------------------------|-------|-------|
| acetaminophen-codeine 300-30mg tablet | Blank | 15    |
| acetaminophen-codeine 300-60mg tablet | 30    | 30    |
| Tylenol®/codeine #3 300-30 mg tablet  | Blank | Blank |
| Tylenol®/codeine #4 300-60 mg tablet  | 30    | 30    |

---

\*Pre-existing defaults are a mixture of those pre-loaded in the base installation of the electronic health record system and those created by our institution when generating defaults for commonly-prescribed medications

For peer review only

## References

1. Guy GP, Jr., Zhang K, Bohm MK, et al. Vital Signs: Changes in Opioid Prescribing in the United States, 2006-2015. *MMWR Morb Mortal Wkly Rep.* 2017;66(26):697-704.
2. Rudd RA, Seth P, David F, Scholl L. Increases in Drug and Opioid-Involved Overdose Deaths - United States, 2010-2015. *MMWR Morb Mortal Wkly Rep.* 2016;65(5051):1445-1452.
3. Florence CS, Zhou C, Luo F, Xu L. The Economic Burden of Prescription Opioid Overdose, Abuse, and Dependence in the United States, 2013. *Med Care.* 2016;54(10):901-906.
4. Bohnert AS, Valenstein M, Bair MJ, et al. Association between opioid prescribing patterns and opioid overdose-related deaths. *JAMA.* 2011;305(13):1315-1321.
5. Fulton-Kehoe D, Sullivan MD, Turner JA, et al. Opioid poisonings in Washington State Medicaid: trends, dosing, and guidelines. *Med Care.* 2015;53(8):679-685.
6. Lewis ET, Cucciare MA, Trafton JA. What do patients do with unused opioid medications? *Clin J Pain.* 2014;30(8):654-662.
7. Adult use of prescription opioid pain medications - Utah, 2008. *MMWR Morb Mortal Wkly Rep.* 2010;59(6):153-157.
8. Kennedy-Hendricks A, Gielen A, McDonald E, McGinty EE, Shields W, Barry CL. Medication Sharing, Storage, and Disposal Practices for Opioid Medications Among US Adults. *JAMA Intern Med.* 2016;176(7):1027-1029.
9. McCabe SE, West BT, Boyd CJ. Leftover prescription opioids and nonmedical use among high school seniors: a multi-cohort national study. *J Adolesc Health.* 2013;52(4):480-485.
10. Hall AJ, Logan JE, Toblin RL, et al. Patterns of abuse among unintentional pharmaceutical overdose fatalities. *JAMA.* 2008;300(22):2613-2620.
11. Center for Behavioral Health Statistics and Quality. *Behavioral health trends in the United States: Results from the 2014 National Survey on Drug Use and Health (HHS Publication No. SMA 15-4927, NSDUH Series H-50).* Rockville, MD 2015.

12. Voepel-Lewis T, Wagner D, Tait AR. Leftover prescription opioids after minor procedures: an unwitting source for accidental overdose in children. *JAMA Pediatr.* 2015;169(5):497-498.
13. Bailey JE, Campagna E, Dart RC. The underrecognized toll of prescription opioid abuse on young children. *Ann Emerg Med.* 2009;53(4):419-424.
14. Johnson EJ, Goldstein D. Medicine. Do defaults save lives? *Science.* 2003;302(5649):1338-1339.
15. Patel MS, Day S, Small DS, et al. Using default options within the electronic health record to increase the prescribing of generic-equivalent medications: a quasi-experimental study. *Ann Intern Med.* 2014;161(10 Suppl):S44-S52.
16. Zwank MD, Kennedy SM, Stuck LH, Gordon BD. Removing default dispense quantity from opioid prescriptions in the electronic medical record. *Am J Emerg Med.* 2017.
17. Von KM, Saunders K, Thomas RG, et al. De facto long-term opioid therapy for noncancer pain. *Clin J Pain.* 2008;24(6):521-527.
18. Hooten WM, St Sauver JL, McGree ME, Jacobson DJ, Warner DO. Incidence and Risk Factors for Progression From Short-term to Episodic or Long-term Opioid Prescribing: A Population-Based Study. *Mayo Clin Proc.* 2015;90(7):850-856.
19. Cantrill SV, Brown MD, Carlisle RJ, et al. Clinical policy: critical issues in the prescribing of opioids for adult patients in the emergency department. *Ann Emerg Med.* 2012;60(4):499-525.
20. Epstein H, Hansen C, Thorson D. A protocol for addressing acute pain and prescribing opioids. *Minn Med.* 2014;97(4):47-51.
21. Chou R, Qaseem A, Snow V, et al. Diagnosis and treatment of low back pain: a joint clinical practice guideline from the American College of Physicians and the American Pain Society. *Ann Intern Med.* 2007;147(7):478-491.
22. Harris K, Curtis J, Larsen B, et al. Opioid pain medication use after dermatologic surgery: a prospective observational study of 212 dermatologic surgery patients. *JAMA Dermatol.* 2013;149(3):317-321.

- 1  
2  
3 23. Bates C, Laciak R, Southwick A, Bishoff J. Overprescription of postoperative narcotics: a look at  
4 postoperative pain medication delivery, consumption and disposal in urological practice. *J Urol*.  
5 2011;185(2):551-555.  
6  
7  
8  
9 24. Maughan BC, Hersh EV, Shofer FS, et al. Unused opioid analgesics and drug disposal following  
10 outpatient dental surgery: A randomized controlled trial. *Drug Alcohol Depend*. 2016;168:328-334.  
11  
12  
13 25. Paulozzi LJ, Strickler GK, Kreiner PW, Koris CM. Controlled Substance Prescribing Patterns -  
14 Prescription Behavior Surveillance System, Eight States, 2013. *MMWR Surveill Summ*. 2015;64(9):1-14.  
15  
16  
17 26. Bohnert AS, Logan JE, Ganoczy D, Dowell D. A Detailed Exploration Into the Association of  
18 Prescribed Opioid Dosage and Overdose Deaths Among Patients With Chronic Pain. *Med Care*. 2016.  
19  
20  
21 27. Dunn KM, Saunders KW, Rutter CM, et al. Opioid prescriptions for chronic pain and overdose: a  
22 cohort study. *Ann Intern Med*. 2010;152(2):85-92.  
23  
24  
25 28. Randolph AG, Haynes RB, Wyatt JC, Cook DJ, Guyatt GH. Users' Guides to the Medical Literature:  
26 XVIII. How to use an article evaluating the clinical impact of a computer-based clinical decision support  
27 system. *JAMA*. 1999;282(1):67-74.  
28  
29  
30 29. Tunis SR, Stryer DB, Clancy CM. Practical clinical trials: increasing the value of clinical research for  
31 decision making in clinical and health policy. *JAMA*. 2003;290(12):1624-1632.  
32  
33  
34 30. Greevy R, Lu B, Silber JH, Rosenbaum P. Optimal multivariate matching before randomization.  
35 *Biostatistics*. 2004;5(2):263-275.  
36  
37  
38 31. Meyer BD. Natural and Quasi-Experiments in Economics. *Journal of Business & Economic Statistics*.  
39 1995;13(2):151-161.  
40  
41  
42 32. Angrist J, Pischke J. *Mostly Harmless Econometrics: An Empiricist's Companion*. Princeton, NJ:  
43 Princeton University Press; 2009.  
44  
45  
46 33. Fazzari MJ, Kim MY, Heo M. Sample size determination for three-level randomized clinical trials  
47 with randomization at the first or second level. *J Biopharm Stat*. 2014;24(3):579-599.  
48  
49  
50  
51  
52  
53  
54  
55  
56  
57  
58  
59  
60

- 1  
2  
3 34. Linder JA, Rigotti NA, Schneider LI, Kelley JH, Brawarsky P, Haas JS. An electronic health record-  
4 based intervention to improve tobacco treatment in primary care: a cluster-randomized controlled trial.  
5  
6  
7 *Arch Intern Med.* 2009;169(8):781-787.  
8  
9 35. Sequist TD, Gandhi TK, Karson AS, et al. A randomized trial of electronic clinical reminders to  
10 improve quality of care for diabetes and coronary artery disease. *J Am Med Inform Assoc.*  
11  
12 2005;12(4):431-437.  
13  
14 36. Campbell MK, Piaggio G, Elbourne DR, Altman DG. Consort 2010 statement: extension to cluster  
15 randomised trials. *Bmj.* 2012;345:e5661.  
16  
17  
18  
19  
20  
21  
22  
23  
24  
25  
26  
27  
28  
29  
30  
31  
32  
33  
34  
35  
36  
37  
38  
39  
40  
41  
42  
43  
44  
45  
46  
47  
48  
49  
50  
51  
52  
53  
54  
55  
56  
57  
58  
59  
60

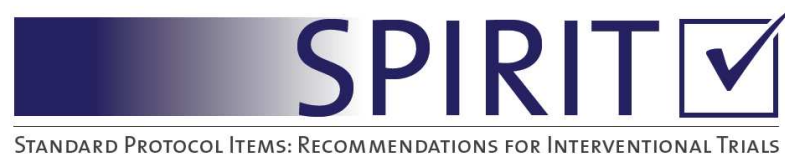

SPIRIT 2013 Checklist: Recommended items to address in a clinical trial protocol and related documents\*

| Section/item                      | Item No | Description                                                                                                                                                                                                                                                                              | Addressed on page number |
|-----------------------------------|---------|------------------------------------------------------------------------------------------------------------------------------------------------------------------------------------------------------------------------------------------------------------------------------------------|--------------------------|
| <b>Administrative information</b> |         |                                                                                                                                                                                                                                                                                          |                          |
| Title                             | 1       | Descriptive title identifying the study design, population, interventions, and, if applicable, trial acronym                                                                                                                                                                             | ___1___                  |
| Trial registration                | 2a      | Trial identifier and registry name. If not yet registered, name of intended registry                                                                                                                                                                                                     | ___1___                  |
|                                   | 2b      | All items from the World Health Organization Trial Registration Data Set                                                                                                                                                                                                                 | ___1, 15___              |
| Protocol version                  | 3       | Date and version identifier                                                                                                                                                                                                                                                              | ___12___                 |
| Funding                           | 4       | Sources and types of financial, material, and other support                                                                                                                                                                                                                              | ___15___                 |
| Roles and responsibilities        | 5a      | Names, affiliations, and roles of protocol contributors                                                                                                                                                                                                                                  | ___1,15___               |
|                                   | 5b      | Name and contact information for the trial sponsor                                                                                                                                                                                                                                       | ___15___                 |
|                                   | 5c      | Role of study sponsor and funders, if any, in study design; collection, management, analysis, and interpretation of data; writing of the report; and the decision to submit the report for publication, including whether they will have ultimate authority over any of these activities | ___15___                 |
|                                   | 5d      | Composition, roles, and responsibilities of the coordinating centre, steering committee, endpoint adjudication committee, data management team, and other individuals or groups overseeing the trial, if applicable (see Item 21a for data monitoring committee)                         | ___12___                 |



1  
2  
3  
4  
5  
6  
7  
8  
9  
10  
11  
12  
13  
14  
15  
16  
17  
18  
19  
20  
21  
22  
23  
24  
25  
26  
27  
28  
29  
30  
31  
32  
33  
34  
35  
36  
37  
38  
39  
40  
41  
42  
43  
44  
45  
46  
47**Introduction**

|                          |    |                                                                                                                                                                                                           |     |
|--------------------------|----|-----------------------------------------------------------------------------------------------------------------------------------------------------------------------------------------------------------|-----|
| Background and rationale | 6a | Description of research question and justification for undertaking the trial, including summary of relevant studies (published and unpublished) examining benefits and harms for each intervention        | 4,5 |
|                          | 6b | Explanation for choice of comparators                                                                                                                                                                     | 6   |
| Objectives               | 7  | Specific objectives or hypotheses                                                                                                                                                                         | 5   |
| Trial design             | 8  | Description of trial design including type of trial (eg, parallel group, crossover, factorial, single group), allocation ratio, and framework (eg, superiority, equivalence, noninferiority, exploratory) | 2   |

**Methods: Participants, interventions, and outcomes**

|                      |     |                                                                                                                                                                                                                                                                                                                                                                                |       |
|----------------------|-----|--------------------------------------------------------------------------------------------------------------------------------------------------------------------------------------------------------------------------------------------------------------------------------------------------------------------------------------------------------------------------------|-------|
| Study setting        | 9   | Description of study settings (eg, community clinic, academic hospital) and list of countries where data will be collected. Reference to where list of study sites can be obtained                                                                                                                                                                                             | 5     |
| Eligibility criteria | 10  | Inclusion and exclusion criteria for participants. If applicable, eligibility criteria for study centres and individuals who will perform the interventions (eg, surgeons, psychotherapists)                                                                                                                                                                                   | 6     |
| Interventions        | 11a | Interventions for each group with sufficient detail to allow replication, including how and when they will be administered                                                                                                                                                                                                                                                     | 6,7   |
|                      | 11b | Criteria for discontinuing or modifying allocated interventions for a given trial participant (eg, drug dose change in response to harms, participant request, or improving/worsening disease)                                                                                                                                                                                 | 12    |
|                      | 11c | Strategies to improve adherence to intervention protocols, and any procedures for monitoring adherence (eg, drug tablet return, laboratory tests)                                                                                                                                                                                                                              | 8,9   |
|                      | 11d | Relevant concomitant care and interventions that are permitted or prohibited during the trial                                                                                                                                                                                                                                                                                  | 11,12 |
| Outcomes             | 12  | Primary, secondary, and other outcomes, including the specific measurement variable (eg, systolic blood pressure), analysis metric (eg, change from baseline, final value, time to event), method of aggregation (eg, median, proportion), and time point for each outcome. Explanation of the clinical relevance of chosen efficacy and harm outcomes is strongly recommended | 7,8   |
| Participant timeline | 13  | Time schedule of enrolment, interventions (including any run-ins and washouts), assessments, and visits for participants. A schematic diagram is highly recommended (see Figure)                                                                                                                                                                                               | 10    |

|   |             |    |                                                                                                                                                                                       |                                      |
|---|-------------|----|---------------------------------------------------------------------------------------------------------------------------------------------------------------------------------------|--------------------------------------|
| 1 |             |    |                                                                                                                                                                                       |                                      |
| 2 |             |    |                                                                                                                                                                                       |                                      |
| 3 | Sample size | 14 | Estimated number of participants needed to achieve study objectives and how it was determined, including clinical and statistical assumptions supporting any sample size calculations | ___11___                             |
| 4 |             |    |                                                                                                                                                                                       |                                      |
| 5 | Recruitment | 15 | Strategies for achieving adequate participant enrolment to reach target sample size                                                                                                   | N/A, patients not directly recruited |
| 6 |             |    |                                                                                                                                                                                       |                                      |
| 7 |             |    |                                                                                                                                                                                       |                                      |

### 9 **Methods: Assignment of interventions (for controlled trials)**

#### 11 Allocation:

|    |                                  |     |                                                                                                                                                                                                                                                                                                                                                          |                                     |
|----|----------------------------------|-----|----------------------------------------------------------------------------------------------------------------------------------------------------------------------------------------------------------------------------------------------------------------------------------------------------------------------------------------------------------|-------------------------------------|
| 12 |                                  |     |                                                                                                                                                                                                                                                                                                                                                          |                                     |
| 13 | Sequence generation              | 16a | Method of generating the allocation sequence (eg, computer-generated random numbers), and list of any factors for stratification. To reduce predictability of a random sequence, details of any planned restriction (eg, blocking) should be provided in a separate document that is unavailable to those who enrol participants or assign interventions | ___9___                             |
| 14 |                                  |     |                                                                                                                                                                                                                                                                                                                                                          |                                     |
| 15 |                                  |     |                                                                                                                                                                                                                                                                                                                                                          |                                     |
| 16 |                                  |     |                                                                                                                                                                                                                                                                                                                                                          |                                     |
| 17 |                                  |     |                                                                                                                                                                                                                                                                                                                                                          |                                     |
| 18 | Allocation concealment mechanism | 16b | Mechanism of implementing the allocation sequence (eg, central telephone; sequentially numbered, opaque, sealed envelopes), describing any steps to conceal the sequence until interventions are assigned                                                                                                                                                | ___9___                             |
| 19 |                                  |     |                                                                                                                                                                                                                                                                                                                                                          |                                     |
| 20 |                                  |     |                                                                                                                                                                                                                                                                                                                                                          |                                     |
| 21 |                                  |     |                                                                                                                                                                                                                                                                                                                                                          |                                     |
| 22 | Implementation                   | 16c | Who will generate the allocation sequence, who will enrol participants, and who will assign participants to interventions                                                                                                                                                                                                                                | ___9___                             |
| 23 |                                  |     |                                                                                                                                                                                                                                                                                                                                                          |                                     |
| 24 |                                  |     |                                                                                                                                                                                                                                                                                                                                                          |                                     |
| 25 | Blinding (masking)               | 17a | Who will be blinded after assignment to interventions (eg, trial participants, care providers, outcome assessors, data analysts), and how                                                                                                                                                                                                                | ___9___                             |
| 26 |                                  |     |                                                                                                                                                                                                                                                                                                                                                          |                                     |
| 27 |                                  |     |                                                                                                                                                                                                                                                                                                                                                          |                                     |
| 28 |                                  | 17b | If blinded, circumstances under which unblinding is permissible, and procedure for revealing a participant's allocated intervention during the trial                                                                                                                                                                                                     | N/A, only investigators are blinded |
| 29 |                                  |     |                                                                                                                                                                                                                                                                                                                                                          |                                     |
| 30 |                                  |     |                                                                                                                                                                                                                                                                                                                                                          |                                     |
| 31 |                                  |     |                                                                                                                                                                                                                                                                                                                                                          |                                     |
| 32 |                                  |     |                                                                                                                                                                                                                                                                                                                                                          |                                     |

### 33 **Methods: Data collection, management, and analysis**

|    |                         |     |                                                                                                                                                                                                                                                                                                                                                                                                              |         |
|----|-------------------------|-----|--------------------------------------------------------------------------------------------------------------------------------------------------------------------------------------------------------------------------------------------------------------------------------------------------------------------------------------------------------------------------------------------------------------|---------|
| 34 |                         |     |                                                                                                                                                                                                                                                                                                                                                                                                              |         |
| 35 | Data collection methods | 18a | Plans for assessment and collection of outcome, baseline, and other trial data, including any related processes to promote data quality (eg, duplicate measurements, training of assessors) and a description of study instruments (eg, questionnaires, laboratory tests) along with their reliability and validity, if known. Reference to where data collection forms can be found, if not in the protocol | ___9___ |
| 36 |                         |     |                                                                                                                                                                                                                                                                                                                                                                                                              |         |
| 37 |                         |     |                                                                                                                                                                                                                                                                                                                                                                                                              |         |
| 38 |                         |     |                                                                                                                                                                                                                                                                                                                                                                                                              |         |
| 39 |                         |     |                                                                                                                                                                                                                                                                                                                                                                                                              |         |
| 40 |                         |     |                                                                                                                                                                                                                                                                                                                                                                                                              |         |
| 41 |                         |     |                                                                                                                                                                                                                                                                                                                                                                                                              |         |
| 42 |                         |     |                                                                                                                                                                                                                                                                                                                                                                                                              |         |
| 43 |                         |     |                                                                                                                                                                                                                                                                                                                                                                                                              |         |
| 44 |                         |     |                                                                                                                                                                                                                                                                                                                                                                                                              |         |
| 45 |                         |     |                                                                                                                                                                                                                                                                                                                                                                                                              |         |
| 46 |                         |     |                                                                                                                                                                                                                                                                                                                                                                                                              |         |
| 47 |                         |     |                                                                                                                                                                                                                                                                                                                                                                                                              |         |

1  
2  
3  
4  
5  
6  
7  
8  
9  
10  
11  
12  
13  
14  
15  
16  
17  
18  
19  
20  
21  
22  
23  
24  
25  
26  
27  
28  
29  
30  
31  
32  
33  
34  
35  
36  
37  
38  
39  
40  
41  
42  
43  
44  
45  
46  
47

|                     |     |                                                                                                                                                                                                                                                                   |                                                                |
|---------------------|-----|-------------------------------------------------------------------------------------------------------------------------------------------------------------------------------------------------------------------------------------------------------------------|----------------------------------------------------------------|
|                     | 18b | Plans to promote participant retention and complete follow-up, including list of any outcome data to be collected for participants who discontinue or deviate from intervention protocols                                                                         | N/A, outcomes collected directly from electronic health record |
| Data management     | 19  | Plans for data entry, coding, security, and storage, including any related processes to promote data quality (eg, double data entry; range checks for data values). Reference to where details of data management procedures can be found, if not in the protocol | ___ 9 ___                                                      |
| Statistical methods | 20a | Statistical methods for analysing primary and secondary outcomes. Reference to where other details of the statistical analysis plan can be found, if not in the protocol                                                                                          | ___ 10,11 ___                                                  |
|                     | 20b | Methods for any additional analyses (eg, subgroup and adjusted analyses)                                                                                                                                                                                          | ___ 10,11 ___                                                  |
|                     | 20c | Definition of analysis population relating to protocol non-adherence (eg, as randomised analysis), and any statistical methods to handle missing data (eg, multiple imputation)                                                                                   | ___ 10,11 ___                                                  |

**Methods: Monitoring**

|                 |     |                                                                                                                                                                                                                                                                                                                                       |               |
|-----------------|-----|---------------------------------------------------------------------------------------------------------------------------------------------------------------------------------------------------------------------------------------------------------------------------------------------------------------------------------------|---------------|
| Data monitoring | 21a | Composition of data monitoring committee (DMC); summary of its role and reporting structure; statement of whether it is independent from the sponsor and competing interests; and reference to where further details about its charter can be found, if not in the protocol. Alternatively, an explanation of why a DMC is not needed | ___ 11,12 ___ |
|                 | 21b | Description of any interim analyses and stopping guidelines, including who will have access to these interim results and make the final decision to terminate the trial                                                                                                                                                               | ___ 11,12 ___ |
| Harms           | 22  | Plans for collecting, assessing, reporting, and managing solicited and spontaneously reported adverse events and other unintended effects of trial interventions or trial conduct                                                                                                                                                     | ___ 11,12 ___ |
| Auditing        | 23  | Frequency and procedures for auditing trial conduct, if any, and whether the process will be independent from investigators and the sponsor                                                                                                                                                                                           | ___ 11,12 ___ |

**Ethics and dissemination**

|                          |    |                                                                                           |            |
|--------------------------|----|-------------------------------------------------------------------------------------------|------------|
| Research ethics approval | 24 | Plans for seeking research ethics committee/institutional review board (REC/IRB) approval | ___ 12 ___ |
|--------------------------|----|-------------------------------------------------------------------------------------------|------------|

|    |                      |     |                                                                                                                 |                      |
|----|----------------------|-----|-----------------------------------------------------------------------------------------------------------------|----------------------|
| 1  |                      |     |                                                                                                                 |                      |
| 2  |                      |     |                                                                                                                 |                      |
| 3  | Protocol             | 25  | Plans for communicating important protocol modifications (eg, changes to eligibility criteria, outcomes,        | ___ 12 ___           |
| 4  | amendments           |     | analyses) to relevant parties (eg, investigators, REC/IRBs, trial participants, trial registries, journals,     |                      |
| 5  |                      |     | regulators)                                                                                                     |                      |
| 6  |                      |     |                                                                                                                 |                      |
| 7  | Consent or assent    | 26a | Who will obtain informed consent or assent from potential trial participants or authorised surrogates, and      | ___ 12 ___           |
| 8  |                      |     | how (see Item 32)                                                                                               |                      |
| 9  |                      |     |                                                                                                                 |                      |
| 10 |                      | 26b | Additional consent provisions for collection and use of participant data and biological specimens in ancillary  | ___ N/A ___          |
| 11 |                      |     | studies, if applicable                                                                                          |                      |
| 12 |                      |     |                                                                                                                 |                      |
| 13 | Confidentiality      | 27  | How personal information about potential and enrolled participants will be collected, shared, and maintained    | ___ 9 ___            |
| 14 |                      |     | in order to protect confidentiality before, during, and after the trial                                         |                      |
| 15 |                      |     |                                                                                                                 |                      |
| 16 | Declaration of       | 28  | Financial and other competing interests for principal investigators for the overall trial and each study site   | ___ 15 ___           |
| 17 | interests            |     |                                                                                                                 |                      |
| 18 |                      |     |                                                                                                                 |                      |
| 19 | Access to data       | 29  | Statement of who will have access to the final trial dataset, and disclosure of contractual agreements that     | ___ 9 ___            |
| 20 |                      |     | limit such access for investigators                                                                             |                      |
| 21 |                      |     |                                                                                                                 |                      |
| 22 | Ancillary and post-  | 30  | Provisions, if any, for ancillary and post-trial care, and for compensation to those who suffer harm from trial | N/A, this is a trial |
| 23 | trial care           |     | participation                                                                                                   | of an electronic     |
| 24 |                      |     |                                                                                                                 | health record        |
| 25 |                      |     |                                                                                                                 | modification         |
| 26 |                      |     |                                                                                                                 |                      |
| 27 | Dissemination policy | 31a | Plans for investigators and sponsor to communicate trial results to participants, healthcare professionals,     | ___ 12 ___           |
| 28 |                      |     | the public, and other relevant groups (eg, via publication, reporting in results databases, or other data       |                      |
| 29 |                      |     | sharing arrangements), including any publication restrictions                                                   |                      |
| 30 |                      |     |                                                                                                                 |                      |
| 31 |                      | 31b | Authorship eligibility guidelines and any intended use of professional writers                                  | ___ 15 ___           |
| 32 |                      |     |                                                                                                                 |                      |
| 33 |                      | 31c | Plans, if any, for granting public access to the full protocol, participant-level dataset, and statistical code | ___ 12 ___           |
| 34 |                      |     |                                                                                                                 |                      |
| 35 |                      |     |                                                                                                                 |                      |
| 36 | <b>Appendices</b>    |     |                                                                                                                 |                      |
| 37 | Informed consent     | 32  | Model consent form and other related documentation given to participants and authorised surrogates              | N/A, trial has       |
| 38 | materials            |     |                                                                                                                 | waiver of informed   |
| 39 |                      |     |                                                                                                                 | consent              |
| 40 |                      |     |                                                                                                                 |                      |
| 41 |                      |     |                                                                                                                 |                      |
| 42 |                      |     |                                                                                                                 |                      |
| 43 |                      |     |                                                                                                                 |                      |
| 44 |                      |     |                                                                                                                 |                      |
| 45 |                      |     |                                                                                                                 |                      |
| 46 |                      |     |                                                                                                                 |                      |
| 47 |                      |     |                                                                                                                 |                      |

1  
2  
3  
4  
5  
6  
7  
8  
9  
10  
11  
12  
13  
14  
15  
16  
17  
18  
19  
20  
21  
22  
23  
24  
25  
26  
27  
28  
29  
30  
31  
32  
33  
34  
35  
36  
37  
38  
39  
40  
41  
42  
43  
44  
45  
46  
47

|                      |    |                                                                                                                                                                                                |           |
|----------------------|----|------------------------------------------------------------------------------------------------------------------------------------------------------------------------------------------------|-----------|
| Biological specimens | 33 | Plans for collection, laboratory evaluation, and storage of biological specimens for genetic or molecular analysis in the current trial and for future use in ancillary studies, if applicable | ___N/A___ |
|----------------------|----|------------------------------------------------------------------------------------------------------------------------------------------------------------------------------------------------|-----------|

---

\*It is strongly recommended that this checklist be read in conjunction with the SPIRIT 2013 Explanation & Elaboration for important clarification on the items. Amendments to the protocol should be tracked and dated. The SPIRIT checklist is copyrighted by the SPIRIT Group under the Creative Commons "[Attribution-NonCommercial-NoDerivs 3.0 Unported](#)" license.

For peer review only

# BMJ Open

## Reducing the default dispense quantity for new opioid analgesic prescriptions: study protocol for a cluster randomized controlled trial

|                                 |                                                                                                                                                                                                                                                                                                                                                                                                                                                                                                                                                                                                                                                                                                                                                                                                                                                                                      |
|---------------------------------|--------------------------------------------------------------------------------------------------------------------------------------------------------------------------------------------------------------------------------------------------------------------------------------------------------------------------------------------------------------------------------------------------------------------------------------------------------------------------------------------------------------------------------------------------------------------------------------------------------------------------------------------------------------------------------------------------------------------------------------------------------------------------------------------------------------------------------------------------------------------------------------|
| Journal:                        | <i>BMJ Open</i>                                                                                                                                                                                                                                                                                                                                                                                                                                                                                                                                                                                                                                                                                                                                                                                                                                                                      |
| Manuscript ID                   | bmjopen-2017-019559.R1                                                                                                                                                                                                                                                                                                                                                                                                                                                                                                                                                                                                                                                                                                                                                                                                                                                               |
| Article Type:                   | Protocol                                                                                                                                                                                                                                                                                                                                                                                                                                                                                                                                                                                                                                                                                                                                                                                                                                                                             |
| Date Submitted by the Author:   | 15-Feb-2018                                                                                                                                                                                                                                                                                                                                                                                                                                                                                                                                                                                                                                                                                                                                                                                                                                                                          |
| Complete List of Authors:       | Bachhuber, Marcus; Montefiore Medical Center/Albert Einstein College of Medicine, Division of General Internal Medicine, Department of Medicine<br>Nash, Denis; City University of New York System; City University of New York System, Epidemiology and Biostatistics<br>Southern, William; Montefiore Medical Center/Albert Einstein College of Medicine, Division of Hospital Medicine<br>Heo, Moonseong; Montefiore Medical Center/Albert Einstein College of Medicine, Department of Epidemiology and Population Health<br>Berger, Matthew; Montefiore Medical Center/Albert Einstein College of Medicine, Division of Hospital Medicine; Montefiore Information Technology<br>Schepis, Mark; Montefiore Information Technology<br>Cunningham, CO; Montefiore Medical Center/Albert Einstein College of Medicine, Division of General Internal Medicine, Department of Medicine |
| <b>Primary Subject Heading</b>: | Addiction                                                                                                                                                                                                                                                                                                                                                                                                                                                                                                                                                                                                                                                                                                                                                                                                                                                                            |
| Secondary Subject Heading:      | General practice / Family practice, Health informatics, Health services research                                                                                                                                                                                                                                                                                                                                                                                                                                                                                                                                                                                                                                                                                                                                                                                                     |
| Keywords:                       | PAIN MANAGEMENT, opioid analgesics, acute pain, electronic health record, default                                                                                                                                                                                                                                                                                                                                                                                                                                                                                                                                                                                                                                                                                                                                                                                                    |
|                                 |                                                                                                                                                                                                                                                                                                                                                                                                                                                                                                                                                                                                                                                                                                                                                                                                                                                                                      |

SCHOLARONE™  
Manuscripts

Title: Reducing the default dispense quantity for new opioid analgesic prescriptions: study protocol for a cluster randomized controlled trial

Authors:

1. Marcus A. Bachhuber, MD MSHP<sup>1</sup>
2. Denis Nash, PhD MPH<sup>2,3</sup>
3. William N. Southern, MD MS<sup>4</sup>
4. Moonseong Heo, PhD<sup>5</sup>
5. Matthew Berger, MD<sup>4,6</sup>
6. Mark Schepis, BA<sup>6</sup>
7. Chinazo O. Cunningham, MD MS<sup>1</sup>

Affiliations:

1. Division of General Internal Medicine, Montefiore Medical Center/Albert Einstein College of Medicine, Bronx, NY, USA
2. Institute for Implementation Science in Population Health, City University of New York (CUNY), New York, NY, USA
3. Department of Epidemiology and Biostatistics, School of Public Health, City University of New York (CUNY), New York, NY, USA
4. Division of Hospital Medicine, Montefiore Medical Center/Albert Einstein College of Medicine, Bronx, NY, USA
5. Department of Epidemiology and Population Health, Montefiore Medical Center/Albert Einstein College of Medicine, Bronx, NY, USA
6. Montefiore Information Technology, Montefiore Medical Center, Bronx, NY, USA

Corresponding Author: Marcus A. Bachhuber (marcus.bachhuber@gmail.com)

1  
2  
3 Abstract (word limit = 300)  
4

#### 5 Introduction

6  
7 As opioid analgesic consumption has grown, so have opioid use disorder and opioid-related overdoses.  
8  
9 Reducing the quantity of opioid analgesics prescribed for acute non-cancer pain can potentially reduce  
10  
11 risks to the individual receiving the prescription and to others who might unintentionally or intentionally  
12  
13 consume any leftover tablets. Reducing the default dispense quantity for new opioid analgesic  
14  
15 prescriptions in the electronic health record (EHR) is a promising intervention to reduce prescribing.  
16

#### 17 Methods and analysis

18  
19 This study is a prospective cluster randomized controlled trial with two parallel arms. Primary care sites  
20  
21 (n=32) and emergency departments (n=4) will be randomized in matched pairs to either a modification of  
22  
23 the EHR so that new opioid analgesic prescriptions default to a dispense quantity of 10 tablets  
24  
25 (intervention) or to no EHR change (control). The dispense quantity will remain fully modifiable by  
26  
27 providers in both arms. From 6 months pre-intervention to 18 months post-intervention, patient-level data  
28  
29 will be analyzed (i.e., the patient is the unit of inference). Patient eligibility criteria are: a) received a new  
30  
31 opioid analgesic prescription, defined as no other opioid analgesic prescription in the prior 6 months; b)  
32  
33 age  $\geq$  18 years; and c) no cancer diagnosis within 1 year prior to the new opioid analgesic prescription.  
34  
35 The primary outcome will be the quantity of opioid analgesics prescribed in the initial prescription.  
36  
37 Secondary outcomes will include opioid analgesic re-orders and health service utilization within 30 days  
38  
39 after the initial prescription. Outcomes will be compared between study arms using a difference-in-  
40  
41 differences analysis.  
42  
43

#### 44 Ethics and dissemination

45  
46 This study has been approved by the Montefiore Medical Center/Albert Einstein College of Medicine  
47  
48 Institutional Review Board with a waiver of informed consent (2016-6036) and is registered on  
49  
50 ClinicalTrials.gov (NCT03003832, 6 December 2016). Findings will be disseminated through  
51  
52 publication, conferences, and meetings with health system leaders.  
53  
54  
55  
56  
57  
58  
59



1  
2  
3 Strengths and limitations of this study: (1-5 points)  
4

- 5 1. Reducing the default dispense quantity for new opioid analgesic prescriptions in the electronic  
6 health record is a novel intervention with the potential for widespread implementation and scale-  
7 up  
8  
9  
10  
11 2. A cluster randomized controlled trial will provide rigorous evidence for or against efficacy  
12  
13 3. Consideration of unintended consequences such as prescription re-orders and increased health  
14 service utilization will provide additional information on the impact of the intervention  
15  
16 4. The setting of the trial (a single urban medical center, with multiple, diverse clinics) may limit  
17 generalizability  
18  
19  
20 5. Lack of access to data (i.e., prescriptions and visits) at outside institutions may lead to  
21 measurement error for some outcomes  
22  
23  
24  
25  
26  
27  
28  
29  
30  
31  
32  
33  
34  
35  
36  
37  
38  
39  
40  
41  
42  
43  
44  
45  
46  
47  
48  
49  
50  
51  
52  
53  
54  
55  
56  
57  
58  
59  
60

## Introduction

In the United States, opioid consumption, opioid use disorder, and fatal overdoses involving opioids have increased dramatically. Between 1999 and 2015, sales of opioid analgesics tripled.<sup>1</sup> In 2015, 33,091 individuals died of a drug overdose involving opioids.<sup>2</sup> Beyond the human cost, the economic cost of opioid use disorder and overdose is estimated to be almost \$80 billion (2015 USD) annually.<sup>3</sup>

While most research aiming to reduce morbidity and mortality from opioid analgesics focuses on people with chronic pain, opioid analgesics for acute non-cancer pain are also associated with significant personal and public health risk. Fatal and non-fatal overdoses occur among people with new or short-term opioid analgesic prescriptions.<sup>4,5</sup> Furthermore, up to 72% of people prescribed opioid analgesics have tablets left over, and most plan to keep them.<sup>6-8</sup> Leftover tablets are often misused, diverted, or accidentally ingested by household members (e.g., children) and are a contributor to overdose mortality beyond the index patient.<sup>9-13</sup> Previous interventions to reduce opioid analgesic prescribing for acute pain have included provider education or promulgation of guidelines; however, these interventions can be labor-intensive and may only have short-lived effects. In addition, as of December 2017, 24 states have passed laws setting limits on new opioid analgesic prescriptions;<sup>14</sup> however, enforcement mechanisms are often unclear and the impact of such laws on prescribing is not known.

Environmental or structural interventions, such as modifying default prescribing options, have the potential to change provider behavior. Defaults can have powerful effects, including in health care settings.<sup>15</sup> For opioid analgesic prescriptions, this would take the form of reducing the default dispense quantity (i.e., the default number of tablets to dispense) for all new prescriptions. While providers can modify the number of tablets actually prescribed, default options can alter practice. For example, within the electronic health record (EHR), changing prescription defaults from brand name to generic increased generic prescribing significantly.<sup>16</sup> In one recent study involving opioid analgesics, *removing* the existing default dispense quantity for two types of opioid analgesics was associated with a modestly higher mean

1  
2  
3 number of tablets dispensed and an increase in the variability of prescriptions, relative to pre-  
4 intervention.<sup>17</sup> While these studies suggest that defaults can alter opioid analgesic prescribing behavior,  
5 the impact of reducing the default dispense quantity to encourage reductions in opioid analgesic  
6 prescribing has not been rigorously studied.  
7  
8  
9  
10

11  
12  
13 While reducing the default dispense quantity for new opioid analgesic prescriptions has the potential to  
14 reduce the quantity prescribed for acute pain, any reduction may be offset, at least in part, by the potential  
15 for unintended consequences. These can include an increased need for prescription re-orders, medical  
16 visits due to inadequately treated pain, or both. However, the large proportion of patients with leftover  
17 opioid analgesic tablets suggests that reductions in the quantity prescribed will simply move toward  
18 aligning prescriptions with what patients actually take for the acute episode of pain.<sup>6-8</sup>  
19  
20  
21  
22  
23  
24  
25  
26  
27

28 The goal of this study is to investigate the impact of a uniform, reduced, default dispense quantity for new  
29 opioid analgesic prescriptions on the quantity prescribed for acute pain. We will test this intervention in a  
30 cluster randomized controlled trial in 32 primary care sites and 4 EDs, responsible for over 19,000 new  
31 opioid analgesic prescriptions annually. We hypothesize that, compared to control, reducing the default  
32 dispense quantity will lead to a higher percentage of prescriptions written for the new, reduced default  
33 number of tablets or fewer. In addition, compared to control, we hypothesize that reducing the default  
34 dispense quantity will not lead to a significant increase in opioid analgesic prescription re-orders or  
35 primary care visits, ED visits, or hospitalizations.  
36  
37  
38  
39  
40  
41  
42  
43  
44  
45  
46

## 47 **Methods and analysis**

### 48 **Study Setting**

49 Montefiore Medical Center (Montefiore) is the largest health care system in The Bronx (a borough of  
50 New York City) and provides comprehensive primary, specialty, surgical, and emergency care at 4  
51 hospitals, 4 EDs, and over 40 ambulatory clinics, with over 3 million patient visits annually. Montefiore  
52  
53  
54  
55  
56  
57  
58  
59  
60

1  
2  
3 is also a major integrated health care delivery system, administering federal (i.e., managed Medicaid and  
4 Medicare) and private insurance plans and coordinating care for approximately 225,000 individuals. For  
5 this study, we have selected the ambulatory settings in which opioid analgesic prescribing is common:  
6  
7 primary care practices and EDs.  
8  
9  
10

### 11 Eligibility criteria

12  
13  
14  
15  
16 *Primary care and ED sites.* We will include all primary care (n=32) and (n=4) ED sites within  
17 Montefiore. Primary care sites can be designated as internal medicine, family medicine, or urgent care.

18  
19  
20 *Provider participants.* As the intervention is a modification to the EHR, the primary participants are  
21 Montefiore providers. Eligible providers will include those who provide adult primary care or ED care.

22  
23  
24 *Patient participants.* We will analyze outcomes for patients that: a) received a *new* opioid analgesic  
25 prescription, defined as no other opioid analgesic prescription of any type in the preceding 6 months (a  
26 definition used in previous cohort studies),<sup>18,19</sup> b) age  $\geq$  18 years; and c) no International Classification of  
27 Diseases, 10<sup>th</sup> Revision, Clinical Modification (ICD-10-CM) diagnosis code for cancer within 1 year prior  
28 to the new opioid analgesic prescription. For patients receiving more than one new opioid analgesic  
29 prescription during the study period, we will only include the first prescription.  
30  
31  
32  
33  
34  
35  
36  
37  
38

### 39 Intervention and control conditions

40  
41 The intervention condition is a site-level change to the EHR to implement a uniform, reduced, default  
42 dispense quantity for new opioid analgesic prescriptions. The number of tablets actually prescribed will  
43 be *fully modifiable* by providers who can tailor the prescription based on clinical factors. The intervention  
44 will include all short-acting opioid analgesics commonly used to treat acute pain: immediate-release  
45 oxycodone, immediate-release hydrocodone, tramadol, and codeine. We will include all brand and  
46 generic formulations and all tablet strengths and co-formulations with acetaminophen.  
47  
48  
49  
50  
51  
52  
53  
54  
55

56 We have chosen 10 tablets as the default dispense quantity for all medication products included in the  
57  
58  
59  
60

1  
2  
3 intervention condition. For opioid analgesics, there are no specific studies addressing the optimal quantity  
4 that minimizes the risks of harms while adequately treating pain. Generally, guidelines recommend a  
5 limited duration with early re-assessment.<sup>20-22</sup> While medications included in the intervention are typically  
6 written for a range of between 1 to 2 tablets every 4 to 6 hours, as needed, patients may only take between  
7 1 and 3 tablets per day total.<sup>23-25</sup> We chose a default of 10 tablets because we believe it represents at least  
8 a 3- to 5-day supply for most patients.  
9  
10  
11  
12  
13  
14

15  
16  
17 The usual EHR will serve as the control condition. Depending on the exact medication product, the pre-  
18 existing default number of tablets is typically 30 or blank, with several outliers (Table). These pre-  
19 existing defaults are a mixture of those pre-loaded in the base installation of our EHR and those created  
20 by our institution when generating defaults for commonly-prescribed medications. While most products  
21 have a pre-existing default, some do not (i.e., the “quantity dispensed” field is blank). Therefore, while  
22 the intervention will reduce the default dispense quantity for most products, it will create a default  
23 dispense quantity for some.  
24  
25  
26  
27  
28  
29  
30  
31  
32  
33  
34

### 35 Outcomes

36 To determine the impact of the intervention, we will analyze patient-level outcomes. Therefore, the unit  
37 of inference is the patient. We will collect outcome data from 6 months prior to intervention  
38 implementation to 18 months after implementation.  
39  
40  
41  
42  
43  
44

45 *Primary outcome: Quantity of opioid analgesics.* This outcome refers to the quantity prescribed in each  
46 new opioid analgesic prescription. We will use three measures of the primary outcome:  
47  
48

- 49 1. *≤ 10 tablets (primary measure, dichotomous).* We will classify all prescriptions as greater than or  
50 less than/equal to 10 tablets (the default). This outcome is relevant specifically to the impact of  
51 the intervention.  
52  
53
- 54 2. *Number of tablets to dispense (continuous).* This outcome is relevant to accidental ingestion and  
55  
56  
57  
58  
59  
60

1  
2  
3 diversion (i.e., the number of tablets available for consumption).

- 4  
5 3. *Total morphine milligram equivalents (MME) to dispense (continuous)*. The use of MME  
6  
7 standardizes comparisons between different types of opioid analgesics with different strengths  
8  
9 and potencies.<sup>26</sup> Overdose risk increases with increasing MME<sup>4,27,28</sup> so this measure is relevant to  
10  
11 overdose risk.  
12  
13

14  
15  
16 Secondary outcomes:

- 17  
18 1. *Opioid analgesic prescription re-orders within 30 days of the initial prescription*. Such re-orders  
19  
20 can occur if patients do not receive an adequate supply of opioid analgesics to treat their pain in  
21  
22 the initial prescription and contact their providers to obtain more. Measured as: a) any re-order  
23  
24 (y/n); b) number of tablets; and c) MME.  
25  
26 2. *Health service utilization within 30 days of the initial prescription*. Medical visits can occur if  
27  
28 patients experience an opioid-related adverse event (e.g., delirium) or intractable pain (e.g., from  
29  
30 not enough medication). We will analyze the number of primary care visits, ED visits, and  
31  
32 hospitalizations for any reason.  
33  
34  
35  
36

37 Provider and patient characteristics (covariates)

38  
39 In addition to primary and secondary outcomes, we will collect additional data on providers and patients.  
40  
41 We have selected variables that are likely to be confounders. For providers, we will collect sex and years  
42  
43 since graduation from medical school. For patients, we will collect demographic information (age, sex,  
44  
45 and race/ethnicity as recorded in the EHR). We will also collect the pain diagnosis at the visit where the  
46  
47 initial opioid analgesic was prescribed (i.e., the indication for the opioid analgesic) in addition to the  
48  
49 presence or absence of a history of psychiatric illness and a history of substance use disorder within the 1  
50  
51 year preceding the initial opioid analgesic prescription. For pain diagnoses, we will group ICD-10-CM  
52  
53 diagnosis codes into clinically meaningful categories based on the diagnostic categories outlined in the  
54  
55 United States Department of Health and Human Services National Pain Strategy.<sup>29</sup> For history of  
56  
57  
58  
59  
60

1  
2  
3 psychiatric illness and history of substance use disorder, we will use existing diagnosis code groupings  
4 produced by the Healthcare Cost and Utilization Project, sponsored by the Agency for Healthcare  
5 Research and Quality of the United States Department of Health and Human Services.<sup>30</sup>  
6  
7  
8  
9

## 10 11 Randomization

12  
13 The unit of randomization will be the site (i.e., cluster randomization). Compared to randomization at the  
14 level of the provider (i.e., individual-level randomization), randomization of sites would be expected to  
15 reduce statistical efficiency due to correlated outcomes within clusters.<sup>31</sup> However, we chose site-level  
16 randomization instead of provider-level randomization to reduce contamination and to potentially  
17 increase the intervention's effectiveness via peer effects.<sup>32,33</sup> At Montefiore, the vast majority of providers  
18 only practice at one site. In addition, technical limitations of Montefiore's EHR (Epic) render provider-  
19 level randomization less feasible.  
20  
21  
22  
23  
24  
25  
26  
27  
28  
29

30  
31 Study sites differ greatly in visit volume and characteristics; therefore, we will randomize in matched  
32 pairs to avoid a major imbalance which could threaten study validity. For randomization, we will stratify  
33 sites by type (i.e., primary care versus emergency department). Further, within primary care sites,  
34 prescribing patterns and the intervention's impact may differ by specialty (i.e., internal medicine and  
35 family medicine) and whether the site is a training site for resident physicians. Therefore, we will stratify  
36 on these variables as well. Within strata, we will use optimal non-bipartite matching to pair sites based on  
37 the number of new opioid analgesic prescriptions, the number of visits, and the percentage of patients  
38 with commercial insurance.<sup>34</sup> For ED sites, given the very large differences in visit volume, we will  
39 divide the 4 sites into a "pair" consisting of the largest ED versus the 3 other smaller EDs combined.  
40  
41  
42  
43  
44  
45  
46  
47  
48  
49  
50

## 51 Blinding

52  
53 Randomization of sites within pairs will be conducted by the study statistician and provided directly to  
54 the health information technology department. Other study investigators will therefore be blind to  
55  
56  
57  
58  
59  
60

1  
2  
3 randomization assignment.  
4  
5

#### 6 7 Data collection and management 8

9 We will obtain provider data from our institution's internal provider directory as well as publicly-  
10 accessible medical license data from New York State. We will obtain all patient data from Montefiore's  
11 EHR. Study data will be stored in an encrypted, password-protected database only accessible to study  
12 investigators.  
13  
14  
15  
16  
17

#### 18 19 20 Statistical analysis 21

22 We will conduct analyses at two time points, 6 months after intervention implementation and 18 months  
23 after intervention implementation. Using a difference-in-differences (DID) analysis, we will determine  
24 the impact of the intervention by comparing the change in outcomes in the intervention group to the  
25 change in outcomes in the control group.<sup>35,36</sup> For example, for the 6-month analysis, we will compare the  
26 change in the intervention group's outcomes from -6 months to +6 months to the change in the control  
27 group's outcomes from -6 months to +6 months.  
28  
29  
30  
31  
32  
33  
34

35  
36  
37 A DID analysis has advantages. First, while we can include covariates to adjust for imbalance in site,  
38 provider, and patient characteristics between intervention and control groups, DID accounts for residual  
39 time-invariant group-level heterogeneity such as differences in baseline outcome levels and hard-to-  
40 measure factors like overall quality of care between intervention and control sites.<sup>36</sup> Second, DID will  
41 allow us to account for prescribing changes due to factors other than the intervention (e.g., state or city  
42 policies aimed at reducing prescribing). For example, in July 2016, New York State enacted a law  
43 limiting opioid analgesic prescriptions for acute pain to a 7-day supply.  
44  
45  
46  
47  
48  
49  
50  
51

52  
53 A DID analysis also relies on several assumptions which we will examine.<sup>36,37</sup> First, we will assess  
54 whether trends in outcomes were parallel between the intervention and control sites prior to the  
55  
56  
57  
58  
59  
60



1  
2  
3 intervention. For this analysis, in the pre-intervention period, we will determine the significance of an  
4 interaction term between study allocation (intervention/control) and month. Second, to determine the  
5 composition of the intervention and the control sites, we will calculate and report descriptive statistics for  
6 both provider and patient characteristics, pre- and post-intervention. Finally, we will examine the  
7 potential for contamination of the arms. Although we expect the number of providers that write  
8 prescriptions at both an intervention and a control site will be low, we will determine the number of such  
9 providers and report it.  
10  
11  
12  
13  
14  
15  
16  
17  
18  
19

20 We will conduct the main DID analysis using generalized linear mixed regression models. We will  
21 include a variable indicating time (pre-intervention/post-intervention) and a variable indicating study  
22 allocation (intervention/control). In DID, the interaction of these two variables is the parameter of  
23 interest. To adjust for potential changes in composition over time, we will include relevant site  
24 characteristics (number of new opioid analgesic prescriptions, the number of visits, and percentage of  
25 patients with commercial insurance), provider characteristics (sex and years since medical school  
26 graduation) and patient characteristics (age, sex, race/ethnicity, pain diagnosis, history of substance use  
27 disorder, history of psychiatric disorder) as covariates in all models. To account for the nesting of patients  
28 within providers and providers within sites, we will include random intercepts both at the provider level  
29 and at the matched site pair level. For all estimates, we will calculate heteroscedasticity robust (empirical)  
30 standard errors.<sup>38,39</sup>  
31  
32  
33  
34  
35  
36  
37  
38  
39  
40  
41  
42  
43  
44  
45  
46

47 For each outcome, we will explore the distribution of the outcome variable and potential transformations  
48 to determine the appropriate regression models (e.g., binomial, linear, Poisson, or negative binomial).

49 When analyzing the impact of the intervention at 18 months, we will identify any change in the  
50 intervention's impact after 6 months (i.e., whether it decays over time) by using the 0 to 6 month post-  
51 intervention period as the referent.  
52  
53  
54  
55  
56  
57  
58  
59  
60

1  
2  
3  
4  
5 In addition to the main analysis, we will conduct several exploratory sub-group analyses. We will analyze  
6 the impact of the intervention stratified by site type (i.e., primary care versus ED) and by medication type  
7 (e.g. Schedule II versus Schedule III and IV). We will also perform separate analyses on products where  
8 the pre-existing default was reduced and products where there was no pre-existing default (i.e., the pre-  
9 existing “quantity dispensed” field was blank).  
10  
11  
12  
13  
14

15  
16  
17  
18 Finally, we intend to explore other analyses examining the precise timing of any changes in outcomes  
19 (e.g., immediate or delayed) and to characterize the heterogeneity of the intervention’s effect between  
20 matched pairs. Such analyses will be defined post-hoc and are subject to availability of resources such as  
21 additional statistical support and technical considerations such as convergence of relevant statistical  
22 models.  
23  
24  
25  
26  
27  
28  
29  
30  
31  
32

### 33 Sample size

34 From preliminary data analyses, we estimate eligible providers (N=17 per site) will write a total of  
35 approximately 7,000 new opioid analgesic prescriptions (N=11 prescriptions per provider) from the 36  
36 sites during a six month post-intervention period. And, in the baseline period (i.e., 6 months prior), 32.7%  
37 of prescriptions will be for  $\leq 10$  tablets. From these parameters, we estimated the minimal detectable  
38 difference between study arms using a 3-level hierarchical model (i.e., patients clustered within providers  
39 who are clustered within matched site pairs). Because the intraclass correlation coefficient (ICC) is not  
40 known, we used a range of ICC from 0.01 to 0.1 at the patient level; only this level of ICC is needed for  
41 power analysis under our study design.<sup>40</sup> Because any change in outcomes in the control arm is also  
42 unknown, we used a range of increases in the percentage of prescriptions for  $\leq 10$  tablets in the control  
43 arm of between 0 and 10 percentage points. Within this range of ICC, change in control arm outcomes,  
44  $\alpha=0.05$ , and power  $\geq 80\%$ , this study will be powered to detect a change in the intervention arm, over  
45  
46  
47  
48  
49  
50  
51  
52  
53  
54  
55  
56  
57  
58  
59  
60

1  
2  
3 and above any change in the control arm, of 4.4 to 4.7 percentage points.  
4  
5  
6

### 7 Timeline and Monitoring 8

9 We randomized sites and implemented the new default dispense quantity for the intervention arm on 13  
10 December 2016. Before this change, primary care sites had the same EHR for approximately 19 months.  
11  
12 Two emergency department sites had the same EHR for 11 months and two emergency department sites  
13  
14 had the same EHR system for 7 months (i.e., those sites implemented the current EHR just before start of  
15  
16 the 6-month pre-intervention period).  
17  
18  
19  
20  
21

22 The principal investigator (MAB) will oversee data and safety monitoring, including review of any  
23  
24 protocol deviations (e.g., unplanned changes to the EHR) and submission of an annual progress report to  
25  
26 the Montefiore Medical Center/Albert Einstein College of Medicine Institutional Review Board and the  
27  
28 study funder (The National Institute on Drug Abuse of the National Institutes of Health). As this study  
29  
30 evaluates an EHR modification using data collected directly from the EHR, study investigators will not  
31  
32 have direct contact with any human subjects. Because of the low-risk nature of the intervention, we will  
33  
34 not convene a formal Data Safety and Monitoring Board and will not conduct planned audits.  
35  
36  
37  
38

### 39 Limitation 40

41 This study has limitations. First, we will only able to obtain data from within our medical center, outside  
42  
43 prescriptions and visits will not be captured. Therefore, we may underestimate the number of opioid  
44  
45 analgesic re-orders and the degree of health service utilization. Further, this may bias the study findings if  
46  
47 patients in one arm are more likely to obtain follow-up care at Montefiore than patients in the other arm.  
48  
49 Second, as our main data source is the EHR, we do not have information on whether prescriptions were  
50  
51 actually dispensed and our outcome measures are limited to those recorded in the course of routine  
52  
53 clinical care. To address this limitation, we are planning to conduct a telephone survey of patients to  
54  
55 determine the impact of the intervention on patient-reported outcomes such as pain, functioning, and  
56  
57  
58  
59  
60

1  
2  
3 patient satisfaction.  
4  
5

## 6 7 **Ethics and dissemination** 8 9

10  
11 This trial was approved by the Montefiore Medical Center/Albert Einstein College of Medicine  
12 Institutional Review Board (IRB number: 2016-6036). This trial was also granted a waiver of informed  
13 consent, similar to previous studies of EHR-based provider interventions.<sup>41,42</sup> During data collection and  
14 analysis, all data collected for this study will be de-identified at the earliest possible opportunity and  
15 stored in an encrypted and password-protected database. At the conclusion of the trial, we will investigate  
16 the feasibility of depositing de-identified data in a publically-accessible repository that maintains  
17 confidentiality.  
18  
19  
20  
21  
22  
23  
24  
25

26  
27  
28 We will disseminate the results of this study through peer-reviewed publications, presentations at  
29 scientific conferences, and meetings with key stakeholders including health system leadership. Reporting  
30 of results will be in accordance with the Consolidated Standards of Reporting Trials (CONSORT)  
31 extension to cluster randomized trials.<sup>43</sup>  
32  
33  
34  
35  
36  
37  
38  
39  
40  
41  
42  
43  
44  
45  
46  
47  
48  
49  
50  
51  
52  
53  
54  
55  
56  
57  
58  
59  
60

1  
2  
3 Authors' contributions: MBa is principal investigator of this trial and led its conception and design. DN,  
4 MH, WS, and CC supervised the study design and all authors (MBa, DN, MH, WS, MS, MBe, and CC)  
5 made substantial contributions to the conception and design of this work. MBa drafted the manuscript and  
6 all authors (MBa, DN, MH, WS, MS, MBe, and CC) revised it for critically important intellectual  
7 content. All authors (MBa, DN, MH, WS, MS, MBe, and CC) provided final approval of the manuscript.  
8  
9  
10  
11  
12  
13  
14  
15

16 Funding: This study is supported by the National Institute on Drug Abuse (K08DA043050) and the  
17 National Center for Advancing Translational Sciences (CTSA Grant UL1TR001073) of the National  
18 Institutes of Health. CC is also supported by the National Institute on Drug Abuse (K24DA036955). CC  
19 and DN are supported by National Institute of Allergy and Infectious Diseases of the National Institutes  
20 of Health (P30AI124414). The content is solely the responsibility of the authors and does not necessarily  
21 represent the official views of the National Institutes of Health. The funding agency has no role in design  
22 or conduct of the study or the decision to publish study results.  
23  
24  
25  
26  
27  
28  
29  
30  
31  
32

33 Competing interests: The authors declare that they have no competing interests  
34  
35  
36  
37  
38  
39  
40  
41  
42  
43  
44  
45  
46  
47  
48  
49  
50  
51  
52  
53  
54  
55  
56  
57  
58  
59  
60

Table. Pre-existing default dispense quantity for short-acting opioid analgesics included in the intervention\*

| Opioid ingredient | Product name and strength                      | Primary care sites | Emergency department sites |
|-------------------|------------------------------------------------|--------------------|----------------------------|
|                   | oxycodone 5 mg tablet                          | 30                 | 30                         |
|                   | oxycodone 5 mg capsule                         | 30                 | 30                         |
|                   | oxycodone 10 mg tablet                         | Blank              | Blank                      |
|                   | oxycodone 15 mg tablet                         | 30                 | 30                         |
|                   | oxycodone 20 mg tablet                         | Blank              | Blank                      |
|                   | oxycodone 30 mg tablet                         | 30                 | 30                         |
|                   | Roxicodone® 5mg tablet                         | 20                 | 20                         |
|                   | Roxicodone® 15 mg tablet                       | 30                 | 30                         |
|                   | Roxicodone® 30 mg tablet                       | 30                 | 30                         |
|                   | oxycodone-acetaminophen 2.5 mg-325 mg tablet   | 30                 | 30                         |
| Oxycodone         | oxycodone-acetaminophen 5 mg-325 mg tablet     | Blank              | Blank                      |
|                   | oxycodone-acetaminophen 7.5 mg-325 mg tablet   | 30                 | 30                         |
|                   | oxycodone-acetaminophen 10 mg-325 mg tablet    | 30                 | 30                         |
|                   | Percocet® 2.5 mg-325 mg tablet                 | 30                 | 30                         |
|                   | Percocet® 5 mg-325 mg tablet                   | Blank              | Blank                      |
|                   | Percocet® 7.5 mg-325 mg tablet                 | 20                 | 20                         |
|                   | Percocet® 10 mg-325 mg tablet                  | 20                 | 20                         |
|                   | Endocet® 2.5 mg-325 mg tablet                  | 30                 | 30                         |
|                   | Endocet® 5 mg-325 mg tablet                    | Blank              | Blank                      |
|                   | Endocet® 7.5 mg-325 mg tablet                  | 30                 | 30                         |
|                   | Endocet® 10 mg-325 mg tablet                   | 30                 | 30                         |
|                   | hydrocodone-acetaminophen 5 mg-300 mg tablet   | 112                | 112                        |
|                   | hydrocodone-acetaminophen 5 mg-325 mg tablet   | 50                 | 30                         |
|                   | hydrocodone-acetaminophen 7.5 mg-300 mg tablet | 180                | 180                        |
|                   | hydrocodone-acetaminophen 7.5 mg-325 mg tablet | 50                 | 30                         |
|                   | hydrocodone-acetaminophen 10 mg-300 mg tablet  | 180                | 180                        |
|                   | hydrocodone-acetaminophen 10 mg-325 mg tablet  | 30                 | 30                         |
| Hydrocodone       | Lortab® 5 mg-325 mg tablet                     | 30                 | 30                         |
|                   | Lortab® 7.5 mg-325 mg tablet                   | 30                 | 30                         |
|                   | Lortab® 10 mg-325 mg tablet                    | 30                 | 30                         |
|                   | Norco® 5 mg-325 mg tablet                      | 30                 | 30                         |
|                   | Norco® 7.5 mg-325 mg tablet                    | 30                 | 30                         |
|                   | Norco® 10 mg-325 mg tablet                     | 30                 | 30                         |
|                   | Tramadol 50 mg tablet                          | Blank              | Blank                      |
| Tramadol          | Ultram® 50 mg tablet                           | 90                 | 20                         |
|                   | Tramadol-acetaminophen 37.5 mg-325 mg tablet   | 30                 | 30                         |
|                   | Ultracet® 37.5 mg -325 mg tablet               | 30                 | 30                         |
| Codeine           | codeine sulfate 15 mg tablet                   | 30                 | 30                         |

1  
2  
3  
4  
5  
6  
7  
8  
9  
10  
11  
12  
13  
14  
15  
16  
17  
18  
19  
20  
21  
22  
23  
24  
25  
26  
27  
28  
29  
30  
31  
32  
33  
34  
35  
36  
37  
38  
39  
40  
41  
42  
43  
44  
45  
46  
47  
48  
49  
50  
51  
52  
53  
54  
55  
56  
57  
58  
59  
60

|                                       |       |       |
|---------------------------------------|-------|-------|
| codeine sulfate 30 mg tablet          | 30    | 30    |
| acetaminophen-codeine 300-15mg tablet | 30    | 30    |
| acetaminophen-codeine 300-30mg tablet | Blank | 15    |
| acetaminophen-codeine 300-60mg tablet | 30    | 30    |
| Tylenol®/codeine #3 300-30 mg tablet  | Blank | Blank |
| Tylenol®/codeine #4 300-60 mg tablet  | 30    | 30    |

---

\*Pre-existing defaults are a mixture of those pre-loaded in the base installation of the electronic health record system and those created by our institution when generating defaults for commonly-prescribed medications

For peer review only

## References

1. Guy GP, Jr., Zhang K, Bohm MK, et al. Vital Signs: Changes in Opioid Prescribing in the United States, 2006-2015. *MMWR Morb Mortal Wkly Rep.* 2017;66(26):697-704.
2. Rudd RA, Seth P, David F, Scholl L. Increases in Drug and Opioid-Involved Overdose Deaths - United States, 2010-2015. *MMWR Morb Mortal Wkly Rep.* 2016;65(5051):1445-1452.
3. Florence CS, Zhou C, Luo F, Xu L. The Economic Burden of Prescription Opioid Overdose, Abuse, and Dependence in the United States, 2013. *Med Care.* 2016;54(10):901-906.
4. Bohnert AS, Valenstein M, Bair MJ, et al. Association between opioid prescribing patterns and opioid overdose-related deaths. *JAMA.* 2011;305(13):1315-1321.
5. Fulton-Kehoe D, Sullivan MD, Turner JA, et al. Opioid poisonings in Washington State Medicaid: trends, dosing, and guidelines. *Med Care.* 2015;53(8):679-685.
6. Lewis ET, Cucciare MA, Trafton JA. What do patients do with unused opioid medications? *Clin J Pain.* 2014;30(8):654-662.
7. Adult use of prescription opioid pain medications - Utah, 2008. *MMWR Morb Mortal Wkly Rep.* 2010;59(6):153-157.
8. Kennedy-Hendricks A, Gielen A, McDonald E, McGinty EE, Shields W, Barry CL. Medication Sharing, Storage, and Disposal Practices for Opioid Medications Among US Adults. *JAMA Intern Med.* 2016;176(7):1027-1029.
9. McCabe SE, West BT, Boyd CJ. Leftover prescription opioids and nonmedical use among high school seniors: a multi-cohort national study. *J Adolesc Health.* 2013;52(4):480-485.
10. Hall AJ, Logan JE, Toblin RL, et al. Patterns of abuse among unintentional pharmaceutical overdose fatalities. *JAMA.* 2008;300(22):2613-2620.
11. Center for Behavioral Health Statistics and Quality. *Behavioral health trends in the United States: Results from the 2014 National Survey on Drug Use and Health (HHS Publication No. SMA 15-4927, NSDUH Series H-50).* Rockville, MD 2015.
12. Voepel-Lewis T, Wagner D, Tait AR. Leftover prescription opioids after minor procedures: an unwitting source for accidental overdose in children. *JAMA Pediatr.* 2015;169(5):497-498.
13. Bailey JE, Campagna E, Dart RC. The underrecognized toll of prescription opioid abuse on young children. *Ann Emerg Med.* 2009;53(4):419-424.
14. National Conference of State Legislatures. Prescribing Policies: States Confront Opioid Overdose Epidemic. Accessed January 29, 2018. (Archived by WebCite® at <http://www.webcitation.org/6wqUxdaQp>).
15. Johnson EJ, Goldstein D. Medicine. Do defaults save lives? *Science.* 2003;302(5649):1338-1339.
16. Patel MS, Day S, Small DS, et al. Using default options within the electronic health record to increase the prescribing of generic-equivalent medications: a quasi-experimental study. *Ann Intern Med.* 2014;161(10 Suppl):S44-S52.
17. Zwank MD, Kennedy SM, Stuck LH, Gordon BD. Removing default dispense quantity from opioid prescriptions in the electronic medical record. *Am J Emerg Med.* 2017.
18. Von KM, Saunders K, Thomas RG, et al. De facto long-term opioid therapy for noncancer pain. *Clin J Pain.* 2008;24(6):521-527.
19. Hooten WM, St Sauver JL, McGree ME, Jacobson DJ, Warner DO. Incidence and Risk Factors for Progression From Short-term to Episodic or Long-term Opioid Prescribing: A Population-Based Study. *Mayo Clin Proc.* 2015;90(7):850-856.
20. Cantrill SV, Brown MD, Carlisle RJ, et al. Clinical policy: critical issues in the prescribing of opioids for adult patients in the emergency department. *Ann Emerg Med.* 2012;60(4):499-525.
21. Epstein H, Hansen C, Thorson D. A protocol for addressing acute pain and prescribing opioids. *Minn Med.* 2014;97(4):47-51.



22. Chou R, Qaseem A, Snow V, et al. Diagnosis and treatment of low back pain: a joint clinical practice guideline from the American College of Physicians and the American Pain Society. *Ann Intern Med.* 2007;147(7):478-491.
23. Harris K, Curtis J, Larsen B, et al. Opioid pain medication use after dermatologic surgery: a prospective observational study of 212 dermatologic surgery patients. *JAMA Dermatol.* 2013;149(3):317-321.
24. Bates C, Laciak R, Southwick A, Bishoff J. Overprescription of postoperative narcotics: a look at postoperative pain medication delivery, consumption and disposal in urological practice. *J Urol.* 2011;185(2):551-555.
25. Maughan BC, Hersh EV, Shofer FS, et al. Unused opioid analgesics and drug disposal following outpatient dental surgery: A randomized controlled trial. *Drug Alcohol Depend.* 2016;168:328-334.
26. Paulozzi LJ, Strickler GK, Kreiner PW, Koris CM. Controlled Substance Prescribing Patterns - Prescription Behavior Surveillance System, Eight States, 2013. *MMWR Surveill Summ.* 2015;64(9):1-14.
27. Bohnert AS, Logan JE, Ganoczy D, Dowell D. A Detailed Exploration Into the Association of Prescribed Opioid Dosage and Overdose Deaths Among Patients With Chronic Pain. *Med Care.* 2016.
28. Dunn KM, Saunders KW, Rutter CM, et al. Opioid prescriptions for chronic pain and overdose: a cohort study. *Ann Intern Med.* 2010;152(2):85-92.
29. U.S. Department Of Health And Human Services. *National Pain Strategy: A Comprehensive Population Health-Level Strategy for Pain.* Washington, DC 2016.
30. Healthcare Cost and Utilization Project (HCUP). Beta Clinical Classifications Software (CCS) for ICD-10-CM/PCS. Available at: <http://www.hcup-us.ahrq.gov/toolssoftware/ccs10/ccs10.jsp>. Accessed January 29, 2018.
31. Donner A, Klar N. Pitfalls of and controversies in cluster randomization trials. *Am J Public Health.* 2004;94(3):416-422.
32. Randolph AG, Haynes RB, Wyatt JC, Cook DJ, Guyatt GH. Users' Guides to the Medical Literature: XVIII. How to use an article evaluating the clinical impact of a computer-based clinical decision support system. *JAMA.* 1999;282(1):67-74.
33. Tunis SR, Stryer DB, Clancy CM. Practical clinical trials: increasing the value of clinical research for decision making in clinical and health policy. *JAMA.* 2003;290(12):1624-1632.
34. Greevy R, Lu B, Silber JH, Rosenbaum P. Optimal multivariate matching before randomization. *Biostatistics.* 2004;5(2):263-275.
35. Meyer BD. Natural and Quasi-Experiments in Economics. *Journal of Business & Economic Statistics.* 1995;13(2):151-161.
36. Angrist J, Pischke J. *Mostly Harmless Econometrics: An Empiricist's Companion.* Princeton, NJ: Princeton University Press; 2009.
37. Ryan AM, Burgess JF, Jr., Dimick JB. Why We Should Not Be Indifferent to Specification Choices for Difference-in-Differences. *Health Serv Res.* 2015;50(4):1211-1235.
38. Huber PJ. The Behavior of Maximum Likelihood Estimates under Nonstandard Conditions. *Proc Fifth Berkeley Symp Math Statist Prob.* 1967;1:221-223.
39. White H. A Heteroskedasticity-Consistent Covariance Matrix Estimator and a Direct Test for Heteroskedasticity. *Econometrica.* 1980;48(4):817-838.
40. Fazzari MJ, Kim MY, Heo M. Sample size determination for three-level randomized clinical trials with randomization at the first or second level. *J Biopharm Stat.* 2014;24(3):579-599.
41. Linder JA, Rigotti NA, Schneider LI, Kelley JH, Brawarsky P, Haas JS. An electronic health record-based intervention to improve tobacco treatment in primary care: a cluster-randomized controlled trial. *Arch Intern Med.* 2009;169(8):781-787.
42. Sequist TD, Gandhi TK, Karson AS, et al. A randomized trial of electronic clinical reminders to improve quality of care for diabetes and coronary artery disease. *J Am Med Inform Assoc.* 2005;12(4):431-437.
43. Campbell MK, Piaggio G, Elbourne DR, Altman DG. Consort 2010 statement: extension to cluster randomised trials. *Bmj.* 2012;345:e5661.

1  
2  
3  
4  
5  
6  
7  
8  
9  
10  
11  
12  
13  
14  
15  
16  
17  
18  
19  
20  
21  
22  
23  
24  
25  
26  
27  
28  
29  
30  
31  
32  
33  
34  
35  
36  
37  
38  
39  
40  
41  
42  
43  
44  
45  
46  
47  
48  
49  
50  
51  
52  
53  
54  
55  
56  
57  
58  
59  
60

For peer review only

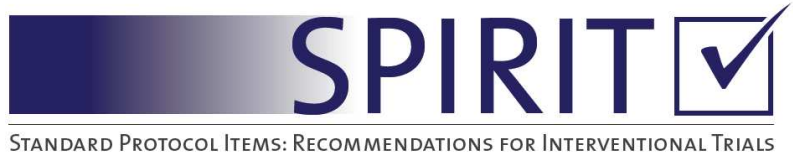

1  
2  
3  
4  
5  
6  
7  
8  
9  
10  
11  
12  
13  
14  
15  
16  
17  
18  
19  
20  
21  
22  
23  
24  
25  
26  
27  
28  
29  
30  
31  
32  
33  
34  
35  
36  
37  
38  
39  
40  
41  
42  
43  
44  
45  
46  
47

SPIRIT 2013 Checklist: Recommended items to address in a clinical trial protocol and related documents\*

| Section/item                      | Item No | Description                                                                                                                                                                                                                                                                              | Addressed on page number |
|-----------------------------------|---------|------------------------------------------------------------------------------------------------------------------------------------------------------------------------------------------------------------------------------------------------------------------------------------------|--------------------------|
| <b>Administrative information</b> |         |                                                                                                                                                                                                                                                                                          |                          |
| Title                             | 1       | Descriptive title identifying the study design, population, interventions, and, if applicable, trial acronym                                                                                                                                                                             | ___1___                  |
| Trial registration                | 2a      | Trial identifier and registry name. If not yet registered, name of intended registry                                                                                                                                                                                                     | ___1___                  |
|                                   | 2b      | All items from the World Health Organization Trial Registration Data Set                                                                                                                                                                                                                 | ___1, 15___              |
| Protocol version                  | 3       | Date and version identifier                                                                                                                                                                                                                                                              | ___12___                 |
| Funding                           | 4       | Sources and types of financial, material, and other support                                                                                                                                                                                                                              | ___15___                 |
| Roles and responsibilities        | 5a      | Names, affiliations, and roles of protocol contributors                                                                                                                                                                                                                                  | ___1,15___               |
|                                   | 5b      | Name and contact information for the trial sponsor                                                                                                                                                                                                                                       | ___15___                 |
|                                   | 5c      | Role of study sponsor and funders, if any, in study design; collection, management, analysis, and interpretation of data; writing of the report; and the decision to submit the report for publication, including whether they will have ultimate authority over any of these activities | ___15___                 |
|                                   | 5d      | Composition, roles, and responsibilities of the coordinating centre, steering committee, endpoint adjudication committee, data management team, and other individuals or groups overseeing the trial, if applicable (see Item 21a for data monitoring committee)                         | ___12___                 |

## Introduction

|                          |    |                                                                                                                                                                                                           |     |
|--------------------------|----|-----------------------------------------------------------------------------------------------------------------------------------------------------------------------------------------------------------|-----|
| Background and rationale | 6a | Description of research question and justification for undertaking the trial, including summary of relevant studies (published and unpublished) examining benefits and harms for each intervention        | 4,5 |
|                          | 6b | Explanation for choice of comparators                                                                                                                                                                     | 6   |
| Objectives               | 7  | Specific objectives or hypotheses                                                                                                                                                                         | 5   |
| Trial design             | 8  | Description of trial design including type of trial (eg, parallel group, crossover, factorial, single group), allocation ratio, and framework (eg, superiority, equivalence, noninferiority, exploratory) | 2   |

## Methods: Participants, interventions, and outcomes

|                      |     |                                                                                                                                                                                                                                                                                                                                                                                |       |
|----------------------|-----|--------------------------------------------------------------------------------------------------------------------------------------------------------------------------------------------------------------------------------------------------------------------------------------------------------------------------------------------------------------------------------|-------|
| Study setting        | 9   | Description of study settings (eg, community clinic, academic hospital) and list of countries where data will be collected. Reference to where list of study sites can be obtained                                                                                                                                                                                             | 5     |
| Eligibility criteria | 10  | Inclusion and exclusion criteria for participants. If applicable, eligibility criteria for study centres and individuals who will perform the interventions (eg, surgeons, psychotherapists)                                                                                                                                                                                   | 6     |
| Interventions        | 11a | Interventions for each group with sufficient detail to allow replication, including how and when they will be administered                                                                                                                                                                                                                                                     | 6,7   |
|                      | 11b | Criteria for discontinuing or modifying allocated interventions for a given trial participant (eg, drug dose change in response to harms, participant request, or improving/worsening disease)                                                                                                                                                                                 | 12    |
|                      | 11c | Strategies to improve adherence to intervention protocols, and any procedures for monitoring adherence (eg, drug tablet return, laboratory tests)                                                                                                                                                                                                                              | 8,9   |
|                      | 11d | Relevant concomitant care and interventions that are permitted or prohibited during the trial                                                                                                                                                                                                                                                                                  | 11,12 |
| Outcomes             | 12  | Primary, secondary, and other outcomes, including the specific measurement variable (eg, systolic blood pressure), analysis metric (eg, change from baseline, final value, time to event), method of aggregation (eg, median, proportion), and time point for each outcome. Explanation of the clinical relevance of chosen efficacy and harm outcomes is strongly recommended | 7,8   |
| Participant timeline | 13  | Time schedule of enrolment, interventions (including any run-ins and washouts), assessments, and visits for participants. A schematic diagram is highly recommended (see Figure)                                                                                                                                                                                               | 10    |

|   |             |    |                                                                                                                                                                                       |                                      |
|---|-------------|----|---------------------------------------------------------------------------------------------------------------------------------------------------------------------------------------|--------------------------------------|
| 1 |             |    |                                                                                                                                                                                       |                                      |
| 2 |             |    |                                                                                                                                                                                       |                                      |
| 3 | Sample size | 14 | Estimated number of participants needed to achieve study objectives and how it was determined, including clinical and statistical assumptions supporting any sample size calculations | ___11___                             |
| 4 |             |    |                                                                                                                                                                                       |                                      |
| 5 | Recruitment | 15 | Strategies for achieving adequate participant enrolment to reach target sample size                                                                                                   | N/A, patients not directly recruited |
| 6 |             |    |                                                                                                                                                                                       |                                      |
| 7 |             |    |                                                                                                                                                                                       |                                      |

9 **Methods: Assignment of interventions (for controlled trials)**

11 Allocation:

|    |                                  |     |                                                                                                                                                                                                                                                                                                                                                          |                                     |
|----|----------------------------------|-----|----------------------------------------------------------------------------------------------------------------------------------------------------------------------------------------------------------------------------------------------------------------------------------------------------------------------------------------------------------|-------------------------------------|
| 12 |                                  |     |                                                                                                                                                                                                                                                                                                                                                          |                                     |
| 13 | Sequence generation              | 16a | Method of generating the allocation sequence (eg, computer-generated random numbers), and list of any factors for stratification. To reduce predictability of a random sequence, details of any planned restriction (eg, blocking) should be provided in a separate document that is unavailable to those who enrol participants or assign interventions | ___9___                             |
| 14 |                                  |     |                                                                                                                                                                                                                                                                                                                                                          |                                     |
| 15 |                                  |     |                                                                                                                                                                                                                                                                                                                                                          |                                     |
| 16 |                                  |     |                                                                                                                                                                                                                                                                                                                                                          |                                     |
| 17 |                                  |     |                                                                                                                                                                                                                                                                                                                                                          |                                     |
| 18 | Allocation concealment mechanism | 16b | Mechanism of implementing the allocation sequence (eg, central telephone; sequentially numbered, opaque, sealed envelopes), describing any steps to conceal the sequence until interventions are assigned                                                                                                                                                | ___9___                             |
| 19 |                                  |     |                                                                                                                                                                                                                                                                                                                                                          |                                     |
| 20 |                                  |     |                                                                                                                                                                                                                                                                                                                                                          |                                     |
| 21 |                                  |     |                                                                                                                                                                                                                                                                                                                                                          |                                     |
| 22 | Implementation                   | 16c | Who will generate the allocation sequence, who will enrol participants, and who will assign participants to interventions                                                                                                                                                                                                                                | ___9___                             |
| 23 |                                  |     |                                                                                                                                                                                                                                                                                                                                                          |                                     |
| 24 |                                  |     |                                                                                                                                                                                                                                                                                                                                                          |                                     |
| 25 | Blinding (masking)               | 17a | Who will be blinded after assignment to interventions (eg, trial participants, care providers, outcome assessors, data analysts), and how                                                                                                                                                                                                                | ___9___                             |
| 26 |                                  |     |                                                                                                                                                                                                                                                                                                                                                          |                                     |
| 27 |                                  |     |                                                                                                                                                                                                                                                                                                                                                          |                                     |
| 28 |                                  | 17b | If blinded, circumstances under which unblinding is permissible, and procedure for revealing a participant's allocated intervention during the trial                                                                                                                                                                                                     | N/A, only investigators are blinded |
| 29 |                                  |     |                                                                                                                                                                                                                                                                                                                                                          |                                     |
| 30 |                                  |     |                                                                                                                                                                                                                                                                                                                                                          |                                     |
| 31 |                                  |     |                                                                                                                                                                                                                                                                                                                                                          |                                     |
| 32 |                                  |     |                                                                                                                                                                                                                                                                                                                                                          |                                     |

33 **Methods: Data collection, management, and analysis**

|    |                         |     |                                                                                                                                                                                                                                                                                                                                                                                                              |         |
|----|-------------------------|-----|--------------------------------------------------------------------------------------------------------------------------------------------------------------------------------------------------------------------------------------------------------------------------------------------------------------------------------------------------------------------------------------------------------------|---------|
| 34 |                         |     |                                                                                                                                                                                                                                                                                                                                                                                                              |         |
| 35 | Data collection methods | 18a | Plans for assessment and collection of outcome, baseline, and other trial data, including any related processes to promote data quality (eg, duplicate measurements, training of assessors) and a description of study instruments (eg, questionnaires, laboratory tests) along with their reliability and validity, if known. Reference to where data collection forms can be found, if not in the protocol | ___9___ |
| 36 |                         |     |                                                                                                                                                                                                                                                                                                                                                                                                              |         |
| 37 |                         |     |                                                                                                                                                                                                                                                                                                                                                                                                              |         |
| 38 |                         |     |                                                                                                                                                                                                                                                                                                                                                                                                              |         |
| 39 |                         |     |                                                                                                                                                                                                                                                                                                                                                                                                              |         |
| 40 |                         |     |                                                                                                                                                                                                                                                                                                                                                                                                              |         |

|    |                                 |     |                                                                                                                                                                                                                                                                                                                                       |                                                                |
|----|---------------------------------|-----|---------------------------------------------------------------------------------------------------------------------------------------------------------------------------------------------------------------------------------------------------------------------------------------------------------------------------------------|----------------------------------------------------------------|
| 1  |                                 |     |                                                                                                                                                                                                                                                                                                                                       |                                                                |
| 2  |                                 |     |                                                                                                                                                                                                                                                                                                                                       |                                                                |
| 3  |                                 | 18b | Plans to promote participant retention and complete follow-up, including list of any outcome data to be collected for participants who discontinue or deviate from intervention protocols                                                                                                                                             | N/A, outcomes collected directly from electronic health record |
| 4  |                                 |     |                                                                                                                                                                                                                                                                                                                                       |                                                                |
| 5  |                                 |     |                                                                                                                                                                                                                                                                                                                                       |                                                                |
| 6  |                                 |     |                                                                                                                                                                                                                                                                                                                                       |                                                                |
| 7  |                                 |     |                                                                                                                                                                                                                                                                                                                                       |                                                                |
| 8  | Data management                 | 19  | Plans for data entry, coding, security, and storage, including any related processes to promote data quality (eg, double data entry; range checks for data values). Reference to where details of data management procedures can be found, if not in the protocol                                                                     | ___ 9 ___                                                      |
| 9  |                                 |     |                                                                                                                                                                                                                                                                                                                                       |                                                                |
| 10 |                                 |     |                                                                                                                                                                                                                                                                                                                                       |                                                                |
| 11 |                                 |     |                                                                                                                                                                                                                                                                                                                                       |                                                                |
| 12 | Statistical methods             | 20a | Statistical methods for analysing primary and secondary outcomes. Reference to where other details of the statistical analysis plan can be found, if not in the protocol                                                                                                                                                              | ___ 10,11 ___                                                  |
| 13 |                                 |     |                                                                                                                                                                                                                                                                                                                                       |                                                                |
| 14 |                                 |     |                                                                                                                                                                                                                                                                                                                                       |                                                                |
| 15 |                                 | 20b | Methods for any additional analyses (eg, subgroup and adjusted analyses)                                                                                                                                                                                                                                                              | ___ 10,11 ___                                                  |
| 16 |                                 |     |                                                                                                                                                                                                                                                                                                                                       |                                                                |
| 17 |                                 | 20c | Definition of analysis population relating to protocol non-adherence (eg, as randomised analysis), and any statistical methods to handle missing data (eg, multiple imputation)                                                                                                                                                       | ___ 10,11 ___                                                  |
| 18 |                                 |     |                                                                                                                                                                                                                                                                                                                                       |                                                                |
| 19 |                                 |     |                                                                                                                                                                                                                                                                                                                                       |                                                                |
| 20 |                                 |     |                                                                                                                                                                                                                                                                                                                                       |                                                                |
| 21 | <b>Methods: Monitoring</b>      |     |                                                                                                                                                                                                                                                                                                                                       |                                                                |
| 22 |                                 |     |                                                                                                                                                                                                                                                                                                                                       |                                                                |
| 23 | Data monitoring                 | 21a | Composition of data monitoring committee (DMC); summary of its role and reporting structure; statement of whether it is independent from the sponsor and competing interests; and reference to where further details about its charter can be found, if not in the protocol. Alternatively, an explanation of why a DMC is not needed | ___ 11,12 ___                                                  |
| 24 |                                 |     |                                                                                                                                                                                                                                                                                                                                       |                                                                |
| 25 |                                 |     |                                                                                                                                                                                                                                                                                                                                       |                                                                |
| 26 |                                 |     |                                                                                                                                                                                                                                                                                                                                       |                                                                |
| 27 |                                 |     |                                                                                                                                                                                                                                                                                                                                       |                                                                |
| 28 |                                 | 21b | Description of any interim analyses and stopping guidelines, including who will have access to these interim results and make the final decision to terminate the trial                                                                                                                                                               | ___ 11,12 ___                                                  |
| 29 |                                 |     |                                                                                                                                                                                                                                                                                                                                       |                                                                |
| 30 |                                 |     |                                                                                                                                                                                                                                                                                                                                       |                                                                |
| 31 | Harms                           | 22  | Plans for collecting, assessing, reporting, and managing solicited and spontaneously reported adverse events and other unintended effects of trial interventions or trial conduct                                                                                                                                                     | ___ 11,12 ___                                                  |
| 32 |                                 |     |                                                                                                                                                                                                                                                                                                                                       |                                                                |
| 33 |                                 |     |                                                                                                                                                                                                                                                                                                                                       |                                                                |
| 34 | Auditing                        | 23  | Frequency and procedures for auditing trial conduct, if any, and whether the process will be independent from investigators and the sponsor                                                                                                                                                                                           | ___ 11,12 ___                                                  |
| 35 |                                 |     |                                                                                                                                                                                                                                                                                                                                       |                                                                |
| 36 |                                 |     |                                                                                                                                                                                                                                                                                                                                       |                                                                |
| 37 |                                 |     |                                                                                                                                                                                                                                                                                                                                       |                                                                |
| 38 | <b>Ethics and dissemination</b> |     |                                                                                                                                                                                                                                                                                                                                       |                                                                |
| 39 |                                 |     |                                                                                                                                                                                                                                                                                                                                       |                                                                |
| 40 | Research ethics approval        | 24  | Plans for seeking research ethics committee/institutional review board (REC/IRB) approval                                                                                                                                                                                                                                             | ___ 12 ___                                                     |
| 41 |                                 |     |                                                                                                                                                                                                                                                                                                                                       |                                                                |
| 42 |                                 |     |                                                                                                                                                                                                                                                                                                                                       |                                                                |
| 43 |                                 |     |                                                                                                                                                                                                                                                                                                                                       |                                                                |
| 44 |                                 |     |                                                                                                                                                                                                                                                                                                                                       |                                                                |
| 45 |                                 |     |                                                                                                                                                                                                                                                                                                                                       |                                                                |
| 46 |                                 |     |                                                                                                                                                                                                                                                                                                                                       |                                                                |
| 47 |                                 |     |                                                                                                                                                                                                                                                                                                                                       |                                                                |

|    |                      |     |                                                                                                                 |                      |
|----|----------------------|-----|-----------------------------------------------------------------------------------------------------------------|----------------------|
| 1  |                      |     |                                                                                                                 |                      |
| 2  |                      |     |                                                                                                                 |                      |
| 3  | Protocol             | 25  | Plans for communicating important protocol modifications (eg, changes to eligibility criteria, outcomes,        | ___ 12 ___           |
| 4  | amendments           |     | analyses) to relevant parties (eg, investigators, REC/IRBs, trial participants, trial registries, journals,     |                      |
| 5  |                      |     | regulators)                                                                                                     |                      |
| 6  |                      |     |                                                                                                                 |                      |
| 7  | Consent or assent    | 26a | Who will obtain informed consent or assent from potential trial participants or authorised surrogates, and      | ___ 12 ___           |
| 8  |                      |     | how (see Item 32)                                                                                               |                      |
| 9  |                      |     |                                                                                                                 |                      |
| 10 |                      | 26b | Additional consent provisions for collection and use of participant data and biological specimens in ancillary  | ___ N/A ___          |
| 11 |                      |     | studies, if applicable                                                                                          |                      |
| 12 |                      |     |                                                                                                                 |                      |
| 13 | Confidentiality      | 27  | How personal information about potential and enrolled participants will be collected, shared, and maintained    | ___ 9 ___            |
| 14 |                      |     | in order to protect confidentiality before, during, and after the trial                                         |                      |
| 15 |                      |     |                                                                                                                 |                      |
| 16 | Declaration of       | 28  | Financial and other competing interests for principal investigators for the overall trial and each study site   | ___ 15 ___           |
| 17 | interests            |     |                                                                                                                 |                      |
| 18 |                      |     |                                                                                                                 |                      |
| 19 | Access to data       | 29  | Statement of who will have access to the final trial dataset, and disclosure of contractual agreements that     | ___ 9 ___            |
| 20 |                      |     | limit such access for investigators                                                                             |                      |
| 21 |                      |     |                                                                                                                 |                      |
| 22 | Ancillary and post-  | 30  | Provisions, if any, for ancillary and post-trial care, and for compensation to those who suffer harm from trial | N/A, this is a trial |
| 23 | trial care           |     | participation                                                                                                   | of an electronic     |
| 24 |                      |     |                                                                                                                 | health record        |
| 25 |                      |     |                                                                                                                 | modification         |
| 26 |                      |     |                                                                                                                 |                      |
| 27 | Dissemination policy | 31a | Plans for investigators and sponsor to communicate trial results to participants, healthcare professionals,     | ___ 12 ___           |
| 28 |                      |     | the public, and other relevant groups (eg, via publication, reporting in results databases, or other data       |                      |
| 29 |                      |     | sharing arrangements), including any publication restrictions                                                   |                      |
| 30 |                      |     |                                                                                                                 |                      |
| 31 |                      | 31b | Authorship eligibility guidelines and any intended use of professional writers                                  | ___ 15 ___           |
| 32 |                      |     |                                                                                                                 |                      |
| 33 |                      | 31c | Plans, if any, for granting public access to the full protocol, participant-level dataset, and statistical code | ___ 12 ___           |
| 34 |                      |     |                                                                                                                 |                      |
| 35 |                      |     |                                                                                                                 |                      |
| 36 | <b>Appendices</b>    |     |                                                                                                                 |                      |
| 37 |                      |     |                                                                                                                 |                      |
| 38 | Informed consent     | 32  | Model consent form and other related documentation given to participants and authorised surrogates              | N/A, trial has       |
| 39 | materials            |     |                                                                                                                 | waiver of informed   |
| 40 |                      |     |                                                                                                                 | consent              |
| 41 |                      |     |                                                                                                                 |                      |
| 42 |                      |     |                                                                                                                 |                      |
| 43 |                      |     |                                                                                                                 |                      |
| 44 |                      |     |                                                                                                                 |                      |
| 45 |                      |     |                                                                                                                 |                      |
| 46 |                      |     |                                                                                                                 |                      |
| 47 |                      |     |                                                                                                                 |                      |

1  
2  
3 Biological 33 Plans for collection, laboratory evaluation, and storage of biological specimens for genetic or molecular \_\_\_\_\_ N/A \_\_\_\_\_  
4 specimens analysis in the current trial and for future use in ancillary studies, if applicable

---

5  
6 \*It is strongly recommended that this checklist be read in conjunction with the SPIRIT 2013 Explanation & Elaboration for important clarification on the items.  
7 Amendments to the protocol should be tracked and dated. The SPIRIT checklist is copyrighted by the SPIRIT Group under the Creative Commons  
8 "[Attribution-NonCommercial-NoDerivs 3.0 Unported](#)" license.  
9

10  
11  
12  
13  
14  
15  
16  
17  
18  
19  
20  
21  
22  
23  
24  
25  
26  
27  
28  
29  
30  
31  
32  
33  
34  
35  
36  
37  
38  
39  
40  
41  
42  
43  
44  
45  
46  
47

For peer review only
